# Supplementary material for: Structural requirements for potential HIV-integrase inhibitors identified using pharmacophore-based virtual screening and molecular dynamics studies
Source: Royal Society of Chemistry journal article supplement (doi:10.1039/c5mb00767d), 2016-01-19
Supplement: c5mb00767d1.pdf [file c5mb00767d1.pdf]

Table S1: Observed, predicted activities and fit values of the test set molecules, obtained using the pharmacophore model *Hypo1*

| Comp. | Smiles                                                                                                  | Activity $\log(IC_{50})$ nM |           | Activity scale |           | Fit value |
|-------|---------------------------------------------------------------------------------------------------------|-----------------------------|-----------|----------------|-----------|-----------|
|       |                                                                                                         | Observed                    | Predicted | Observed       | Predicted |           |
| HT1   | <chem>OC=1C(=O)N(C)C(=NC=1C(=O)NC/C2=C/C=C(/[F])C=C2)[C@]3([H])C[C@@](O)([H])CCN3C</chem>               | 1.322                       | 0.650     | +++            | +++       | 13.532    |
| HT2   | <chem>OC=1C(=O)N(C)C(=NC=1C(=O)NC/C2=C/C=C(/[F])C=C2)[C@]3([H])C[C@@]([H])(CCN3C)OC/C4=C/C=C=C4</chem>  | 1.792                       | 0.580     | +++            | +++       | 13.602    |
| HT3   | <chem>OC=1C(=O)N(C)C(=NC=1C(=O)NCC/C2=C/C=CC=C2)[C@@]3([H])COCCN3C</chem>                               | 1.851                       | 0.672     | +++            | +++       | 13.510    |
| HT4   | <chem>OC=1C(=O)N(C)C(=NC=1C(=O)NC/C2=C/C=C/C=C2/[F])[C@@]3([H])COCCN3C</chem>                           | 2.243                       | 2.094     | ++             | ++        | 13.531    |
| HT5   | <chem>OC=1C(=O)N(C)C(=NC=1C(=O)NC/C2=C/C=CC([F])=C2)[C@@]3([H])COCCN3C</chem>                           | 1.792                       | 1.815     | +++            | +++       | 13.515    |
| HT6   | <chem>O=C1NC=N/C(=C1/O)C(=O)NC/C2=C/C=C(/[F])C=C2</chem>                                                | 1.778                       | 1.877     | +++            | +++       | 13.501    |
| HT7   | <chem>O=C1NC(=N/C(=C1/O)C(=O)NC/C2=C/C=C(/[F])C=C2)[C@](C)([H])N(C)C</chem>                             | 2.000                       | 0.696     | ++             | +++       | 13.487    |
| HT8   | <chem>OC=1C(=O)NC(=NC=1C(=O)NC/C2=C/C=C(/[F])C=C2)[C@@]3([H])COCCN3C</chem>                             | 1.000                       | 0.695     | +++            | +++       | 13.488    |
| HT9   | <chem>OC=2C(=O)N1CC[C@]([H])(C1=NC=2C(=O)NC/C3=C/C=C(/[F])C=C3)N(C)C</chem>                             | 0.845                       | 0.647     | +++            | +++       | 13.536    |
| HT10  | <chem>CN1CCC[C@]1([H])C=2NC(=O)C(O)=C(N=2)C(=O)NC/C3=C/C=C(/[F])C=C3</chem>                             | 2.079                       | 2.050     | ++             | ++        | 13.472    |
| HT11  | <chem>O=C1NC(=N/C(=C1/O)C(=O)NC/C2=C/C=C(/[F])C=C2)[C@@]3([H])CCCCN3C</chem>                            | 2.342                       | 2.257     | ++             | ++        | 13.421    |
| HT12  | <chem>OC=1C(=O)N(C)C(=NC=1C(=O)NC/C2=C/C=C(/[F])C=C2)[C@@]3([H])CCCN3C</chem>                           | 2.000                       | 2.010     | ++             | ++        | 13.445    |
| HT13  | <chem>OC=1C(=O)N(C)C(=NC=1C(=O)NC/C2=C/C=C(/[F])C=C2)[C@]3([H])CCCCN3C</chem>                           | 2.643                       | 2.654     | ++             | ++        | 13.477    |
| HT14  | <chem>OC=1C(=O)N(C)C(=NC=1C(=O)NC/C2=C/C=C(/[F])C=C2)[C@]3([H])N(C)CC[C@]3(C)[H]</chem>                 | 2.851                       | 2.818     | ++             | ++        | 13.457    |
| HT15  | <chem>OC=1C(=O)N(C)C(=NC=1C(=O)NC/C2=C/C=C(/[F])C=C2)[C@]3([H])C[C@@](C)([H])CN3C</chem>                | 1.000                       | 0.711     | +++            | +++       | 13.472    |
| HT16  | <chem>OC=2C(=O)N1CCCC[C@]([H])(C1=NC=2C(=O)NC/C3=C/C=C(/[F])C=C3)N(C)[S](C)(=O)=O</chem>                | 1.204                       | 0.721     | +++            | +++       | 13.462    |
| HT17  | <chem>OC=2C(=O)N1CCCC[C@]([H])(C1=NC=2C(=O)NC/C3=C/C=C(/[F])C=C3)N(C)[S](=O)(=O)C4=C(C)N(C)N=C4C</chem> | 0.845                       | 0.632     | +++            | +++       | 13.551    |
| HT18  | <chem>OC=2C(=O)N1CC[C@]([H])(C1=NC=2C(=O)NC/C3=C/C=C(/[F])C=C3)N(C)[S](=O)(=O)N(C)C</chem>              | 1.653                       | 0.631     | +++            | +++       | 13.551    |
| HT19  | <chem>OC=2C(=O)N1CCCC[C@]([H])(C1=NC=2C(=O)NC/C3=C/C=C(/[F])C=C3)N(C)C(=O)C(=O)N(C)C</chem>             | 1.544                       | 0.922     | +++            | +++       | 13.261    |
| HT20  | <chem>OC=2C(=O)N1CCCC[C@]([H])(C1=NC=2C(=O)NC/C3=C/C=C(/[F])C=C3)N(C)[S](=O)(=O)N(C)C</chem>            | 0.845                       | 0.636     | +++            | +++       | 13.546    |
| HT21  | <chem>OC=1C(=O)N(C)C(=NC=1C(=O)NC/C2=C/C=CC(=C2)OC)[C@]3([H])COCCN3C</chem>                             | 2.146                       | 2.080     | ++             | ++        | 13.478    |
| HT22  | <chem>OC=1C(=O)N(C)C(=NC=1C(=O)NC/C2=C/C=C(/[F])C=C2)[C@]3([H])COCCN3C</chem>                           | 1.322                       | 0.725     | +++            | +++       | 13.457    |
| HT23  | <chem>OC=1C(=O)N(C)C(=NC=1C(=O)NC/C2=C/C=C(/[F])C=C2)[C@]3([H])COCCN3C</chem>                           | 1.934                       | 1.902     | +++            | +++       | 13.477    |
| HT24  | <chem>OC=1C(=O)N(C)C(=NC=1C(=O)NC/C2=C/C=C(/[F])C=C2)[C@]3([H])C[C@@]([H])(CN3C)OCC</chem>              | 2.301                       | 2.304     | ++             | ++        | 13.515    |
| HT25  | <chem>OC=1C(=O)N(C)C(=NC=1C(=O)NC/C2=C/C=C(/[F])C=C2)[C@]3([H])C[C@@]([H])(CN3C)OCC=4C=CC=CC=4</chem>   | 2.114                       | 2.098     | ++             | ++        | 13.582    |
| HT26  | <chem>OC=1C(=O)N(C)C(=NC=1C(=O)NC/C2=C/C=C(/[F])C=C2)[C@]3([H])C[C@@]([H])(CN3C)NC(C)=O</chem>          | 1.785                       | 1.701     | +++            | +++       | 13.529    |
| HT27  | <chem>OC=1C(=O)N(C)C(=NC=1C(=O)NC/C2=C/C=C(/[F])C=C2)[C@]3([H])CC[C@@](C)([H])N3C</chem>                | 2.839                       | 2.699     | ++             | ++        | 13.543    |
| HT28  | <chem>OC=1C(=O)N(C)C(=NC=1C(=O)NC/C2=C/C=C(/[F])C=C2)[C@]3([H])C[C@@](O)([H])CN3C</chem>                | 2.000                       | 1.979     | ++             | +++       | 13.475    |
| HT29  | <chem>OC=1C(=O)N(C)C(=NC=1C(=O)NC/C2=C/C=C(/[F])C=C2)[C@]3([H])C[C@@]([H])(CN3C)OC</chem>               | 2.255                       | 2.304     | ++             | ++        | 13.535    |
| HT30  | <chem>OC=1C(=O)N(C)C(=NC=1C(=O)NC/C2=C/C=CC([Cl])=C2)[C@]3([H])COCCN3C</chem>                           | 1.792                       | 1.683     | +++            | +++       | 13.521    |
| HT31  | <chem>OC=1C(=O)N(C)C(=NC=1C(=O)NC/C2=C/C=CC([Br])=C2)[C@]3([H])COCCN3C</chem>                           | 1.279                       | 0.639     | +++            | +++       | 13.544    |
| HT32  | <chem>OC=1C(=O)N(C)C(=NC=1C(=O)NC/C2=C/C=C(/[F])C=C2)[C@@]3([H])COCCN3C(=O)OC(C)C</chem>                | 1.301                       | 0.641     | +++            | +++       | 13.541    |
| HT33  | <chem>OC=1C(=O)N(C)C(=NC=1C(=O)NC/C2=C/C=CC=C2)[C@]3([H])COCCN3C</chem>                                 | 1.820                       | 1.815     | +++            | +++       | 13.436    |
| HT34  | <chem>O=C1NC(=N/C(=C1/O)C(=O)NC/C2=C/C=C(/[F])C=C2</chem>                                               | 1.699                       | 1.710     | +++            | +++       | 13.469    |

|      | 2)C(C)(C)N(C)C                                                                            |       |       |     |     |        |
|------|-------------------------------------------------------------------------------------------|-------|-------|-----|-----|--------|
| HT35 | OC=1C(=O)N(C)C(=NC=1C(=O)NC/C2=C/C=C(/[F])C=C2)[C@]3([H])CN(CCN3C)C(=O)C                  | 1.505 | 0.648 | +++ | +++ | 13.535 |
| HT36 | OC=1C(=O)N(C)C(=NC=1C(=O)NC/C2=C/C=C(/[F])C=C2)[C@]3([H])CN(C)CCN3C(C)=O                  | 3.602 | 3.582 | +   | +   | 13.531 |
| HT37 | OC=1C(=O)N(C)C(=NC=1C(=O)NC/C2=C/C=C(/[F])C=C2)[C@]3([H])CN(CCN3C)C(=O)C=4C=CC=CC=4       | 1.079 | 0.674 | +++ | +++ | 13.509 |
| HT38 | OC=1C(=O)N(C)C(=NC=1C(=O)NC/C2=C/C=C(/[F])C=C2)[C@]3([H])CN(CCN3C)C(=O)CN(C)C             | 0.602 | 0.636 | +++ | +++ | 13.546 |
| HT39 | OC=2C(=O)N1CCCC[C@]([H])(C1=NC=2C(=O)NC/C3=C/C=C(/[F])C=C3)N(C)C                          | 1.839 | 0.626 | +++ | +++ | 13.557 |
| HT40 | OC=2C(=O)N1CCCC[C@]([H])(C1=NC=2C(=O)NC/C3=C/C=C(/[F])C=C3)N(C)C                          | 2.740 | 2.655 | ++  | ++  | 13.524 |
| HT41 | OC=2C(=O)N1CCCC[C@]([H])(C1=NC=2C(=O)NC/C3=C/C=C(/[F])C=C3)N4CCCC4                        | 1.799 | 1.834 | +++ | +++ | 13.518 |
| HT42 | OC=2C(=O)N1CCCC[C@]([H])(C1=NC=2C(=O)NC/C3=C/C=C(/[F])C=C3)N(C)[S](=O)(=O)N(C)C           | 0.699 | 0.636 | +++ | +++ | 13.546 |
| HT43 | OC=2C(=O)N1CC[C@]([H])(C1=NC=2C(=O)NC/C3=C/C=C(/[F])C=C3)N(C)C(=O)C(=O)N(C)C              | 1.301 | 0.627 | +++ | +++ | 13.556 |
| HT44 | OC=2C(=O)N1CCCC[C@]([H])(C1=NC=2C(=O)NC/C3=C/C=C(/[F])C=C3)N4CCOCC4                       | 1.792 | 1.742 | +++ | +++ | 13.441 |
| HT45 | OC=1C(=O)N(C)C(=NC=1C(=O)NC/C2=C/C=C(/[F])C=C2)[C@]3([H])CN(CCN3C)[S](=O)(=O)C=4C=CC=CC=4 | 0.845 | 0.674 | +++ | +++ | 13.508 |
| HT46 | OC=1C(=O)N(C)C(=NC=1C(=O)NC/C2=C/C=C(/[F])C=C2)[C@]3([H])CN(CCN3C)[S](=O)(=O)N(C)C        | 0.903 | 0.640 | +++ | +++ | 13.542 |
| HT47 | OC=1C(=O)N(C)C(=NC=1C(=O)NC/C2=C/C=C(/[F])C=C2)[C@]3([H])COCCN3                           | 1.699 | 1.352 | +++ | +++ | 12.831 |
| HT48 | OC=1C(=O)N(C)C(=NC=1C(=O)NC/C2=C/C=C(/[F])C=C2)[C@]3([H])COCCN3CC                         | 1.519 | 1.481 | +++ | +++ | 13.514 |
| HT49 | OC=1C(=O)N(C)C(=NC=1C(=O)NC/C2=C/C=C(/[F])C=C2)[C@]3([H])COCCN3C(=O)C                     | 1.176 | 0.691 | +++ | +++ | 13.491 |
| HT50 | OC=2C(=O)N1CCCC[C@]([H])(C1=NC=2C(=O)NC/C3=C/C=C(/[F])C=C3)N(C)C(=O)C(=O)N(C)C            | 1.079 | 0.661 | +++ | +++ | 13.522 |
| HT51 | OC=2C(=O)N1CCCC[C@]([H])(C1=NC=2C(=O)NC/C3=C/C=C(/[F])C=C3)N(C)C(=O)C(=O)N(C)C            | 1.114 | 0.922 | +++ | +++ | 13.261 |
| HT52 | OC=1C(=O)N(C)C(=NC=1C(=O)NC/C2=C/C=C(/[F])C=C2)[C@]3([H])CC([F])([F])CN3C                 | 1.477 | 0.743 | +++ | +++ | 13.439 |
| HT53 | O=C1NC(=N/C(=C1/O)C(=O)NC/C2=C/C=C(/[F])C=C2)CN(C)C                                       | 2.301 | 2.211 | ++  | ++  | 13.513 |
| HT54 | OC=2C(=O)N1CCCC[C@]([H])(C1=NC=2C(=O)NC/C3=C/C=C(/[F])C=C3)N(C)C/C4=C/C=CC=C4             | 0.602 | 0.650 | +++ | +++ | 13.532 |
| HT55 | OC=2C(=O)N1CCCC[C@]([H])(C1=NC=2C(=O)NC/C3=C/C=C(/[F])C=C3)N(C)CC=4C=CC=CC=4              | 1.792 | 1.742 | +++ | +++ | 13.479 |
| HT56 | OC=2C(=O)N1CCCC1=NC=2C(=O)NC/C3=C/C=C(/[F])C=C3                                           | 0.903 | 0.627 | +++ | +++ | 13.556 |
| HT57 | OC=2C(=O)N1CCCCC1=NC=2C(=O)NC/C3=C/C=C(/[F])C=C3                                          | 0.699 | 0.637 | +++ | +++ | 13.546 |
| HT58 | OC=2C(=O)N1CC[C@]([H])(C1=NC=2C(=O)NC/C3=C/C=C(/[F])C=C3)N(C)C(C)=O                       | 0.954 | 0.634 | +++ | +++ | 13.548 |
| HT59 | OC=2C(=O)N1CCCC[C@]([H])(C1=NC=2C(=O)NC/C3=C/C=C(/[F])C=C3)N(C)C(C)=O                     | 0.778 | 0.815 | +++ | +++ | 13.367 |
| HT60 | OC=2C(=O)N1CCCC[C@]([H])(C1=NC=2C(=O)NC/C3=C/C=C(/[F])C=C3)N(C)C(C)=O                     | 0.903 | 1.936 | +++ | +++ | 12.246 |
| HT61 | OC=2C(=O)N1CCCC[C@]([H])(C1=NC=2C(=O)NC/C3=C/C=C(/[F])C=C3)N(C)C(=O)C([F])([F])[H]        | 1.255 | 0.921 | +++ | +++ | 13.262 |
| HT62 | OC=2C(=O)N1CCCC[C@]([H])(C1=NC=2C(=O)NC/C3=C/C=C(/[F])C=C3)N(C)C(=O)C5=NN4C=CC=NC4=N5     | 1.000 | 0.683 | +++ | +++ | 13.499 |
| HT63 | OC=2C(=O)N1CCCC[C@]([H])(C1=NC=2C(=O)NC/C3=C/C=C(/[F])C=C3)N(C)C(=O)C[S](=O)(=O)N(C)C     | 0.954 | 0.655 | +++ | +++ | 13.528 |
| HT64 | OC=2C(=O)N1CCCC[C@]([H])(C1=NC=2C(=O)NC/C3=C/C=C(/[F])C=C3)N(C)C(=O)C[S](=O)(=O)C         | 0.778 | 0.564 | +++ | +++ | 13.619 |
| HT65 | OC=2C(=O)N1CCCC[C@]([H])(C1=NC=2C(=O)NC/C3=C/C=C(/[F])C=C3)N(C)C(=O)C(=O)N(C)C            | 0.845 | 0.661 | +++ | +++ | 13.522 |
| HT66 | OC=2C(=O)N1CCCC[C@]([H])(C1=NC=2C(=O)NC/C3=C/C=C(/[F])C=C3)N(C)C(=O)C(=O)N(C)C            | 1.079 | 0.922 | +++ | +++ | 13.261 |
| HT67 | O=C1NC(=N/C(=C1/O)C(=O)NC/C2=C/C=CC=C2)C3=CC=C[S]3                                        | 1.929 | 1.834 | +++ | +++ | 13.527 |
| HT68 | O=C1NC(=N/C(=C1/O)C(=O)NC/C2=C/C=C(/[F])C=C2)C3=CC=C[S]3                                  | 1.000 | 0.651 | +++ | +++ | 13.531 |
| HT69 | O=C1NC(C)=N/C(=C1/O)C(=O)NC/C2=C/C=C(/[F])C=C2                                            | 1.778 | 1.547 | +++ | +++ | 13.547 |
| HT70 | O=C1NC(=N/C(=C1/O)C(=O)NC/C2=C/C=CC=C2)C3=CC=CC=3                                         | 1.845 | 1.775 | +++ | +++ | 13.467 |

|       |                                                                                       |       |       |     |     |        |
|-------|---------------------------------------------------------------------------------------|-------|-------|-----|-----|--------|
| HT71  | O=C1NC(=N/C(=C1/O)C(=O)NC/C2=C/C=C(/[F])C=C2/C/C3=C/C=CC=C3                           | 1.699 | 1.656 | +++ | +++ | 13.477 |
| HT72  | O=C1NC(=N/C(=C1/O)C(=O)NC/C2=C/C=C(/[F])C=C2)[C@]([H])(C3=CC=CC=C3)N(C)C              | 2.301 | 2.323 | ++  | ++  | 13.516 |
| HT73  | OC=2C(=O)N1CCC[C@@]([H])(C1=NC=2C(=O)NC/C3=C/C=C(/[F])C=C3)N(C)[S](=O)(=O)N4CCN(C)CC4 | 0.845 | 0.652 | +++ | +++ | 13.531 |
| HT74  | OC=1C(=O)N(C)C(=NC=1C(=O)NC/C2=C/C=C(/[F])C=C2)[C@]3([H])C[C@@]([F])([H])CN3C         | 1.301 | 0.723 | +++ | +++ | 13.459 |
| HT75  | OC=2C(=O)N1CCCCC1=NC=2C(=O)NC/C3=C/C=C(/[F])C=C3                                      | 1.279 | 0.629 | +++ | +++ | 13.553 |
| HT76  | OC=2C(=O)N1CCCC[C@]([H])(C1=NC=2C(=O)NC/C3=C/C=C(/[F])C=C3)N(C)C(=O)C[S](C)(=O)=O     | 1.230 | 0.548 | +++ | +++ | 13.634 |
| HT77  | OC=2C(=O)N1CCC[C@]([H])(NC(=O)C[S](=O)(=O)C)C1=NC=2C(=O)NC/C3=C/C=C(/[F])C=C3         | 0.845 | 0.621 | +++ | +++ | 13.562 |
| HT78  | OC=2C(=O)N1CCC[C@@]([H])(C1=NC=2C(=O)NC/C3=C/C=C(/[F])C=C3)N(C)[S](C)(=O)=O           | 1.079 | 0.699 | +++ | +++ | 13.484 |
| HT79  | OC=2C(=O)N1CCC[C@@]([H])(C1=NC=2C(=O)NC/C3=C/C=C(/[F])C=C3)N4CCCN(C)[S]4(=O)=O        | 1.146 | 0.683 | +++ | +++ | 13.500 |
| HT80  | OC=2C(=O)N1CCCC[C@]([H])(C1=NC=2C(=O)NC/C3=C/C=C(/[F])C=C3)N4CCCN(C)[S]4(=O)=O        | 0.778 | 0.794 | +++ | +++ | 13.388 |
| HT81  | OC=2C(=O)N1CCC[C@@]([H])(C1=NC=2C(=O)NC/C3=C/C=C(/[F])C=C3)N(C)[S](=O)(=O)N4CCCC4     | 0.845 | 0.756 | +++ | +++ | 13.426 |
| HT82  | OC=2C(=O)N1CCC[C@@]([H])(C1=NC=2C(=O)NC/C3=C/C=C(/[F])C=C3)N(C)[S](=O)(=O)N4CCCC4     | 0.954 | 0.691 | +++ | +++ | 13.491 |
| HT83  | OC=2C(=O)N1CCC[C@@]([H])(C1=NC=2C(=O)NC/C3=C/C=C(/[F])C=C3)N(C)[S](=O)(=O)N4CCOCC4    | 1.041 | 0.743 | +++ | +++ | 13.440 |
| HT84  | OC=2C(=O)N1CCC[C@@]([H])(C1=NC=2C(=O)NC/C3=C/C=C(/[F])C=C3)N(C)[S](=O)(=O)N4CCN(C)CC4 | 0.845 | 0.652 | +++ | +++ | 13.531 |
| HT85  | OC=1C(=O)N(C)C(=NC=1C(=O)NC/C2=C/C=C(/[F])C=C2)[C@]3([H])C[S]CCN3C                    | 1.845 | 1.813 | +++ | +++ | 13.478 |
| HT86  | OC=1C(=O)N(C)C(=NC=1C(=O)NC/C2=C/C=C(/[F])C=C2)[C@]3([H])C[S](=O)CCN3C                | 1.568 | 1.625 | +++ | +++ | 13.466 |
| HT87  | OC=1C(=O)N(C)C(=NC=1C(=O)NC/C2=C/C=C(/[F])C=C2)[C@]3([H])C[S](=O)(=O)CCN3C            | 2.146 | 2.098 | ++  | ++  | 13.555 |
| HT88  | OC=1C(=O)N(C)C(=NC=1C(=O)NC/C2=C/C=C(/[F])C=C2)[C@]3([H])CN(C)CCN3C                   | 2.000 | 1.951 | ++  | +++ | 13.446 |
| HT89  | OC=1C(=O)N(C)C(=NC=1C(=O)NC/C2=C/C=C(/[F])C=C2)[C@]3([H])CN(C)C(=O)CN3C               | 1.699 | 1.583 | +++ | +++ | 13.522 |
| HT90  | OC=1C(=O)N(C)C(=NC=1C(=O)NC/C2=C/C=C(/[F])C=C2)[C@]3([H])CNCCN3C                      | 2.301 | 2.323 | ++  | ++  | 13.452 |
| HT91  | OC=1C(=O)N(C)C(=NC=1C(=O)NC/C2=C/C=C(/[F])C=C2)[C@]3([H])CN(CCN3C)CC                  | 2.398 | 2.098 | ++  | ++  | 13.505 |
| HT92  | OC=1C(=O)N(C)C(=NC=1C(=O)NC/C2=C/C=C(/[F])C=C2)[C@]3([H])CN(CCN3C)C(C)(C)[H]          | 2.114 | 2.256 | ++  | ++  | 13.538 |
| HT93  | OC=1C(=O)N(C)C(=NC=1C(=O)NC/C2=C/C=C(/[F])C=C2)[C@]3([H])CN(CCN3C)C(=O)OC(C)(C)C      | 1.613 | 1.710 | +++ | +++ | 13.480 |
| HT94  | O=C1C(O)=C(N=C(N1C)C(C)(C)NC(=O)C(=O)N(C)C(=O)NC/C2=C/C=C(/[F])C=C2                   | 1.000 | 1.464 | +++ | +++ | 12.718 |
| HT95  | O=C1C(O)=C(N=C(N1C)C(C)(C)NC(=O)C(=O)OC)C(=O)NC/C2=C/C=C(/[F])C=C2                    | 1.176 | 1.498 | +++ | +++ | 12.685 |
| HT96  | O=C1C(O)=C(N=C(N1C)C(C)(C)NC(C)=O)C(=O)NC/C2=C/C=C(/[F])C=C2                          | 0.845 | 2.112 | +++ | ++  | 12.071 |
| HT97  | O=C1C(O)=C(N=C(N1C)C(C)(C)NC(=O)C(=O)N(C)C(=O)NC/C2=C/C=CC(OC)=C2OC                   | 1.322 | 2.522 | +++ | ++  | 11.661 |
| HT98  | O=C1C(O)=C(N=C(N1C)C(C)(C)NC(=O)C(=O)N(C)C(=O)NC/C2=C/C=C(/[F])C=C2[S](C)(=O)=O       | 0.602 | 1.065 | +++ | +++ | 13.118 |
| HT99  | O=C1C(O)=C(N=C(N1C)C(C)(C)NC(=O)C(=O)N(C)C(=O)NC/C2=C/C=C(/[F])C(C[Cl])=C2            | 0.954 | 0.878 | +++ | +++ | 13.304 |
| HT100 | O=C1C(O)=C(N=C(N1C)C(C)(C)NC(=O)C2=CC=CC=N2)C(=O)NC/C3=C/C=C(/[F])C=C3                | 1.301 | 1.393 | +++ | +++ | 12.790 |
| HT101 | O=C1C(O)=C(N=C(N1C)C(C)(C)NC(=O)C2=CC=CN=N2)C(=O)NC/C3=C/C=C(/[F])C=C3                | 1.176 | 1.164 | +++ | +++ | 13.018 |
| HT102 | O=C1C(O)=C(N=C(N1C)C(C)(C)NC(=O)C2=CN=CC=C(N=2)C(=O)NC/C3=C/C=C(/[F])C=C3             | 0.845 | 1.089 | +++ | +++ | 13.094 |
| HT103 | O=C1C(O)=C(N=C(N1C)C(C)(C)NC(=O)C2=CN=CO2)C(=O)NC/C3=C/C=C(/[F])C=C3                  | 0.845 | 1.065 | +++ | +++ | 13.118 |
| HT104 | O=C1C(O)=C(N=C(N1C)C(C)(C)NC(=O)C2=C[S]C=N2)C(=O)NC/C3=C/C=C(/[F])C=C3                | 0.903 | 1.204 | +++ | +++ | 12.978 |
| HT105 | O=C1C(O)=C(N=C(N1C)C(C)(C)NC(=O)C2=CN=CN2)C(=O)NC/C3=C/C=C(/[F])C=C3                  | 0.778 | 1.392 | +++ | +++ | 12.790 |
| HT106 | [F]/C1=C/C=C(C=C1)CN2CC4=C(C2=O)C(O)=C3N=C=C/C3=C4/OC                                 | 1.778 | 3.171 | +++ | +   | 11.012 |
| HT107 | [F]/C1=C/C=C(C=C1)C/C2=C/C=C(O2)C(=O)CC(=O)                                           | 1.663 | 1.547 | +++ | +++ | 13.581 |

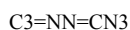

|       |                                                                                      |       |       |     |     |        |
|-------|--------------------------------------------------------------------------------------|-------|-------|-----|-----|--------|
| HT108 | [F]/C1=C/C=C(C=C1)CN2C=C/C=C2/C(=O)CC(=O)C(=O)O                                      | 1.568 | 0.851 | +++ | +++ | 13.332 |
| HT109 | O=C(CC(=O)C(=O)O)C2=CC(CC=1C=CC=CC=1)=CC=C2                                          | 1.415 | 0.544 | +++ | +++ | 13.639 |
| HT110 | [F]/C1=C([C1])C=C/C=C1/C/C2=C/C=C3C(=C2)C(=O)C(=CN3[C@]([H])(CC)CO)C(=O)O            | 1.623 | 1.240 | +++ | +++ | 12.943 |
| HT111 | [F]/C1=C/C=C(C=C1)CNC(=O)C3=NC(=C2C=CC=N/C2=C3)O)N4CCCC[S]4(=O)=O                    | 1.643 | 0.927 | +++ | +++ | 13.256 |
| HT112 | [F]/C1=C/C=C(C=C1)CN4CC3=C(C=C2N=CC=C/C2=C3)OC)C4=O                                  | 4.380 | 4.413 | +   | +   | 11.067 |
| HT113 | O=C1C(O)=C(N=C(N1C)C(C)(C)NC(=O)N(C)C)C(=O)NC/C2=C/C=C([F])C=C2                      | 1.255 | 1.854 | +++ | +++ | 12.329 |
| HT114 | O=C1C(O)=C(N=C(N1C)C(C)(C)N[S](=O)(=O)N(C)C)C(=O)NC/C2=C/C=C([F])C=C2                | 1.079 | 0.861 | +++ | +++ | 13.322 |
| HT115 | OC=2C1=NC=CC=C1C(=NC=2/C3=N/N=C(O3)C/C4=C/C=C([F])C=C4)C=5C=CC=CC=5[S](=O)(=O)NC     | 0.602 | 0.775 | +++ | +++ | 13.408 |
| HT116 | OC=2C1=NC=CC=C1C(=NC=2/C4=N/N=C(C/C3=C/C=C([F])C=C3)N4)N5CCCC[S]5(=O)=O              | 1.041 | 0.792 | +++ | +++ | 13.390 |
| HT117 | OC=2C1=NC=CC=C1C(=NC=2/C4=N/N=C(C/C3=C/C=C([F])C=C3)O4)N5CCCC[S]5(=O)=O              | 0.301 | 0.772 | +++ | +++ | 13.410 |
| HT118 | O=C1C(O)=C(N=C(N1C)C(C)(C)NC(=O)C(=O)N2CCN(C)CC2)C(=O)NC/C3=C/C=C([F])C=C3           | 1.415 | 1.128 | +++ | +++ | 13.054 |
| HT119 | O=C1C(O)=C(N=C(N1C)C(C)(C)NC(=O)C2=N/N=C(C)O)C(=O)NC/C3=C/C=C([F])C=C3               | 1.176 | 1.295 | +++ | +++ | 12.887 |
| HT120 | O=C1C(O)=C(N=C(N1C)C(C)(C)NC(=O)C2=N/N=C(C)N2)C(=O)NC/C3=C/C=C([F])C=C3              | 0.602 | 1.164 | +++ | +++ | 13.018 |
| HT121 | O=C1C(O)=C(N=C(N1C)C(C)(C)NC(=O)C(=O)O)C(=O)NC/C2=C/C=C([F])C=C2                     | 0.602 | 0.922 | +++ | +++ | 13.261 |
| HT122 | O=C1C(O)=C(N=C(N1C)C(C)(C)N(C)C(=O)C(=O)N(C)C)C(=O)NC/C2=C/C=C([F])C=C2              | 1.176 | 2.262 | +++ | ++  | 11.921 |
| HT123 | O=C1C(O)=C(N=C(N1C)C(C)(C)NC(=O)C(=O)N2CCOCC2)C(=O)NC/C3=C/C=C([F])C=C3              | 1.301 | 1.767 | +++ | +++ | 12.415 |
| HT124 | O=C1C(O)=C(N=C(N1C)C(C)(C)N[S](C)(=O)=O)C(=O)NC/C2=C/C=C([F])C=C2                    | 0.903 | 0.909 | +++ | +++ | 13.273 |
| HT125 | O=C1C(O)=C(N=C(N1C)C(C)(C)N(C)C)C(=O)NC/C2=C/C=C([F])C=C2                            | 2.362 | 2.427 | ++  | ++  | 11.755 |
| HT126 | O=C1C(O)=C(N=C(N1C)C(C)(C)N2CCOCC2)C(=O)NC/C3=C/C=C([F])C=C3                         | 0.477 | 0.764 | +++ | +++ | 13.419 |
| HT127 | OC=2C1=NC=CC=C1C(=NC=2/C3=N/N=C(O3)C/C4=C/C=C([F])C=C4)N5CCCC5=O                     | 1.279 | 1.237 | +++ | +++ | 13.403 |
| HT128 | OC=2C1=NC=CC=C1C(=NC=2/C3=N/N=C(O3)C/C4=C/C=C([F])C=C4)C=5C=COC=5                    | 1.362 | 0.764 | +++ | +++ | 13.418 |
| HT129 | OC=2C1=NC=CC=C1C(=NC=2/C3=N/N=C(O3)C/C4=C/C=C([F])C=C4)C5=CC=CN5                     | 1.079 | 0.763 | +++ | +++ | 13.419 |
| HT130 | OC=2C1=NC=CC=C1C(=NC=2/C3=N/N=C(O3)C/C4=C/C=C([F])C=C4)C(=O)NC(C)(C)[H]              | 2.279 | 2.251 | ++  | ++  | 13.417 |
| HT131 | OC=2C1=NC=CC=C1C(=NC=2/C3=N/N=C(O3)C/C4=C/C=C([F])C=C4)C5=CC=C(C=C5)C#N              | 1.176 | 0.767 | +++ | +++ | 13.416 |
| HT132 | OC=2C1=NC=CC=C1C(=NC=2/C3=N/N=C(O3)C/C4=C/C=C([F])C=C4)C=5C=CC=CC=5[S](=O)(=O)N(C)C  | 0.602 | 0.775 | +++ | +++ | 13.407 |
| HT133 | OC=2C1=NC=CC=C1C(=NC=2/C3=N/N=C(O3)C/C4=C/C=C([F])C=C4)C5=CC=C(C=C5)[S](=O)(=O)N(C)C | 1.255 | 0.774 | +++ | +++ | 13.408 |
| HT134 | COC=2C=1CN(C)C(=O)C=1C(O)=C3N=CC(=CC=23)C/C4=C/C=C([F])C=C4                          | 2.000 | 2.760 | ++  | ++  | 11.422 |
| HT135 | COC=2C=1CNC(=O)C=1C(O)=C3N=CC(=CC=23)C/C4=C/C=C([F])C=C4                             | 1.146 | 2.791 | +++ | ++  | 11.391 |
| HT136 | COC=3C=2CN(C/C1=C/C=C([F])C=C1)C(=O)C=2C(O)=C4N=CC(=CC=34)C/C5=C/C=C([F])C=C5        | 2.778 | 2.757 | ++  | ++  | 11.426 |
| HT137 | CN(C=2C=1CN(C)C(=O)C=1C(O)=C3N=CC(=CC=23)C/C4=C/C=C([F])C=C4)[S](C)(=O)=O            | 1.903 | 2.325 | +++ | ++  | 11.858 |
| HT138 | CN(C=2C=1CN(C)C(=O)C=1C(O)=C3N=CC(=CC=23)C/C4=C/C([C1])=C([F])C=C4)[S](C)(=O)=O      | 2.423 | 2.267 | ++  | ++  | 11.916 |
| HT139 | OC=2C1=NC=CC=C1C(=NC=2/C3=N/N=C(O3)C/C4=C/C=C([F])C=C4)C5=CC=C(C=C5)N[S](C)(=O)=O    | 0.477 | 0.781 | +++ | +++ | 13.401 |
| HT140 | OC=2C1=NC=CC=C1C(=NC=2/C3=N/N=C(O3)C/C4=C/C=C([F])C=C4)C=5C=CC=CC=5[S](C)(=O)=O      | 1.041 | 0.773 | +++ | +++ | 13.409 |
| HT141 | OC=2C1=NC=CC=C1C(=NC=2/C3=N/N=C(O3)C/C4=C/C=C([F])C=C4)C5=CC(=CC=C5)[S](C)(=O)=O     | 0.778 | 0.774 | +++ | +++ | 13.408 |
| HT142 | OC=2C1=NC=CC=C1C=NC=2/C3=N/OC(=N3)C/C4=C/C=C([F])C=C4                                | 2.114 | 2.162 | ++  | ++  | 13.292 |
| HT143 | OC=2C1=NC=CC=C1C=NC=2/C4=N/N=C(C/C3=C/C=CC=C3)N4                                     | 2.556 | 2.505 | ++  | ++  | 13.372 |
| HT144 | OC=2C1=NC=CC=C1C=NC=2/C4=N/N=C(C/C3=C/C=C([F])C=C3)N4                                | 2.114 | 2.218 | ++  | ++  | 13.370 |

|       |                                                                                       |       |       |     |     |        |
|-------|---------------------------------------------------------------------------------------|-------|-------|-----|-----|--------|
| HT145 | OC=2C1=NC=CC=C1C=NC=2/C4=N/N=C(/C/C3=C/C=C(/[Cl])C=C3)N4                              | 2.806 | 2.820 | ++  | ++  | 13.375 |
| HT146 | OC=2C1=NC=CC=C1C=NC=2/C4=N/N=C(/C/C3=C/C([Cl])=CC=C3)N4                               | 3.013 | 3.009 | +   | +   | 13.373 |
| HT147 | OC=2C1=NC=CC=C1C=NC=2/C4=N/N=C(/C/C3=C/C(=CC=C3)OC)N4                                 | 3.447 | 3.438 | +   | +   | 13.371 |
| HT148 | OC=2C1=NC=CC=C1C=NC=2/C4=N/N=C(/C/C3=C/C(OC)=C(C=C3)OC)N4                             | 3.799 | 3.815 | +   | +   | 13.372 |
| HT149 | OC=2C1=NC=CC=C1C(=NC=2/C3=N/N=C(O3)C/C4=C/C=C(/[F])C=C4)C5=CC=C(C=C5)C(=O)O           | 0.301 | 0.771 | +++ | +++ | 13.411 |
| HT150 | OC=2C1=NC=CC=C1C(=NC=2/C3=N/N=C(O3)C/C4=C/C=C(/[F])C=C4)C5=CC=C(C=C5)C(=O)NC(C)(C)[H] | 0.602 | 0.778 | +++ | +++ | 13.404 |
| HT151 | OC=2C1=NC=CC=C1C=NC=2/C4=N/N=C(/C/C3=C/C(=CC=C3)O4                                    | 2.114 | 2.098 | ++  | ++  | 13.376 |
| HT152 | OC=2C1=NC=CC=C1C=NC=2/C4=N/N=C(/C/C3=C/C=C(/[F])C=C3)O4                               | 1.623 | 1.701 | +++ | +++ | 13.375 |
| HT153 | OC=2C1=NC=CC=C1C(=NC=2/C3=N/N=C(O3)C/C4=C/C=C(/[F])C=C4)C(=O)N5CCOCC5                 | 2.114 | 0.999 | ++  | +++ | 13.184 |
| HT154 | OC=2C1=NC=CC=C1C(=NC=2/C3=N/N=C(O3)C/C4=C/C=C(/[F])C=C4)C5=CC=C(C=C5)C(=O)NC          | 0.602 | 0.774 | +++ | +++ | 13.409 |
| HT155 | OC=2C1=NC=CC=C1C(=NC=2/C3=N/N=C(O3)C/C4=C/C=C(/[F])C=C4)C5=CC=C(C=C5)C(=O)N(C)C       | 1.255 | 1.016 | +++ | +++ | 13.167 |
| HT156 | OC=2C1=NC=CC=C1C(=NC=2/C3=N/N=C(O3)C/C4=C/C=C(/[F])C=C4)C(=O)NC                       | 2.079 | 2.042 | ++  | ++  | 13.414 |
| HT157 | OC=2C1=NC=CC=C1C(=NC=2/C3=N/N=C(O3)C/C4=C/C=C(/[F])C=C4)C5=NC=CC=C5                   | 1.477 | 1.419 | +++ | +++ | 13.407 |
| HT158 | OC=2C1=NC=CC=C1C(=NC=2/C3=N/N=C(O3)C/C4=C/C=C(/[F])C=C4)C5=CC(=CC=C5)C(O)=O           | 0.301 | 0.771 | +++ | +++ | 13.412 |
| HT159 | OC=2C1=NC=CC=C1C=NC=2/C3=N/OC(=N3)C/C4=C/C=C=C4                                       | 2.978 | 2.914 | ++  | ++  | 13.298 |
| HT160 | OC=2C1=NC=CC=C1C(=NC=2/C3=N/N=C(O3)C/C4=C/C=C(/[F])C=C4)C(=O)NCCO                     | 2.114 | 0.543 | ++  | +++ | 13.639 |
| HT161 | OC=2C1=NC=CC=C1C(=NC=2/C3=N/N=C(O3)C/C4=C/C=C(/[F])C=C4)C(=O)NCCCCO                   | 1.851 | 0.562 | +++ | +++ | 13.621 |
| HT162 | OC=2C1=NC=CC=C1C(=NC=2/C3=N/N=C(O3)C/C4=C/C=C(/[F])C=C4)N5CCN(C)C5=O                  | 1.176 | 0.769 | +++ | +++ | 13.414 |
| HT163 | OC=2C1=NC=CC=C1C(=NC=2/C3=N/N=C(O3)C/C4=C/C=C(/[F])C=C4)N5CCCCC5=O                    | 1.944 | 1.836 | +++ | +++ | 13.309 |
| HT164 | OC=2C1=NC=CC=C1C(=NC=2/C3=N/N=C(O3)C/C4=C/C=C(/[F])C=C4)N5CCCCC5=O                    | 1.398 | 1.347 | +++ | +++ | 13.406 |
| HT165 | OC=2C1=NC=CC=C1C(=NC=2/C3=N/N=C(O3)C/C4=C/C=C(/[F])C=C4)N5CCOC5=O                     | 1.114 | 0.773 | +++ | +++ | 13.409 |
| HT166 | OC=2C1=NC=CC=C1C(=NC=2/C3=N/N=C(O3)C/C4=C/C=C(/[F])C=C4)N5CCNC5=O                     | 1.041 | 0.772 | +++ | +++ | 13.410 |
| HT167 | OC=2C1=NC=CC=C1C(=NC=2/C3=N/N=C(O3)C/C4=C/C=C(/[F])C=C4)N[S](=O)(=O)C                 | 1.279 | 1.237 | +++ | +++ | 13.410 |
| HT168 | OC=2C1=NC=CC=C1C(=NC=2/C3=N/N=C(O3)C/C4=C/C=C(/[F])C=C4)C5=CN=CC=C5                   | 1.041 | 1.051 | +++ | +++ | 13.411 |
| HT169 | OC=2C1=NC=CC=C1C(=NC=2/C3=N/N=C(O3)C/C4=C/C=C(/[F])C=C4)C5=CC=NC=C5                   | 0.903 | 0.779 | +++ | +++ | 13.403 |
| HT170 | OC=2C1=NC=CC=C1C(=NC=2/C3=N/N=C(O3)C/C4=C/C=C(/[F])C=C4)N5CCNC5=O                     | 1.079 | 0.776 | +++ | +++ | 13.407 |
| HT171 | OC=2C1=NC=CC=C1C(=NC=2/C3=N/N=C(O3)C/C4=C/C=C(/[F])C=C4)C5=CC=C(C=C5)[S](C)(=O)=O     | 0.954 | 0.771 | +++ | +++ | 13.411 |
| HT172 | OC=2C1=NC=CC=C1C(=NC=2/C3=N/N=C(O3)C/C4=C/C=C(/[F])C=C4)C(=O)N5CCN(C)CC5              | 1.643 | 1.626 | +++ | +++ | 13.407 |
| HT173 | OC=2C1=NC=CC=C1C(=NC=2/C3=N/N=C(O3)C/C4=C/C=C(/[F])C=C4)C(=O)N5CC[C@@](O)([H])CC5     | 1.431 | 0.765 | +++ | +++ | 13.417 |
| HT174 | OC=2C1=NC=CC=C1C=NC=2/C4=N/N=C(/C/C3=C/N(=CC=C3)N4                                    | 3.544 | 3.406 | +   | +   | 13.371 |
| HT175 | OC=2C1=NC=CC=C1C(=NC=2/C3=N/N=C(O3)C/C4=C/C=C(/[F])C=C4)C5=CC=C(C=C5)NC(C)=O          | 0.602 | 0.776 | +++ | +++ | 13.407 |
| HT176 | OC=2C1=NC=CC=C1C(=NC=2/C3=N/N=C(O3)C/C4=C/C=C(/[F])C=C4)N5CCN(CCO)C5=O                | 1.114 | 0.564 | +++ | +++ | 13.618 |
| HT177 | OC=2C1=NC=CC=C1C(=NC=2/C3=N/N=C(O3)C/C4=C/C=C(/[F])C=C4)NC(C)=O                       | 1.857 | 1.910 | +++ | +++ | 13.301 |
| HT178 | OC=2C1=NC=CC=C1C(=NC=2/C3=N/N=C(O3)C/C4=C/C=C(/[F])C=C4)N(C)C(C)=O                    | 1.447 | 1.347 | +++ | +++ | 13.400 |
| HT179 | OC=2C1=NC=CC=C1C(=NC=2/C3=N/N=C(O3)C/C4=C/C=C(/[F])C=C4)C(=O)N5CC(=O)NCC5             | 1.869 | 1.865 | +++ | +++ | 13.419 |
| HT180 | OC=2C1=NC=CC=C1C=NC=2/C4=N/N=C(C)C(C/C3=C/C=C(/[F])C=C3)=N4                           | 3.898 | 3.854 | +   | +   | 13.363 |
| HT181 | OC=2C1=NC=CC=C1C(=NC=2/C3=N/N=C(O3)C/C4=C/C=C(/[F])C=C4)C5=CC(=CC=C5)C(=O)NC(C)(C)[H] | 1.000 | 0.786 | +++ | +++ | 13.396 |

|       |                                                                                                       |       |       |     |     |        |
|-------|-------------------------------------------------------------------------------------------------------|-------|-------|-----|-----|--------|
|       | J                                                                                                     |       |       |     |     |        |
| HT182 | OC=2C1=NC=CC=C1C(=NC=2/C3=N/N=C(O3)C/C4=C/C=C(/[F])C=C4)N5C=CC=N5                                     | 0.602 | 0.754 | +++ | +++ | 13.428 |
| HT183 | OC=2C1=NC=CC=C1C(=NC=2/C3=N/N=C(O3)C/C4=C/C=C(/[F])C=C4)N5C=CC(C)=N5                                  | 1.322 | 1.419 | +++ | +++ | 13.430 |
| HT184 | OC=2C1=NC=CC=C1C(=NC=2/C3=N/N=C(O3)C/C4=C/C=C(/[F])C=C4)C#N                                           | 2.380 | 2.412 | ++  | ++  | 13.418 |
| HT185 | OC=2C1=NC=CC=C1C(=NC=2/C3=N/N=C(O3)C/C4=C/C=C(/[F])C=C4)C(=O)N                                        | 2.000 | 1.979 | ++  | +++ | 13.414 |
| HT186 | OC=2C1=NC=CC=C1C(=NC=2/C3=N/N=C(O3)C/C4=C/C=C(/[F])C=C4)C(=O)O                                        | 2.934 | 2.916 | ++  | ++  | 13.418 |
| HT187 | OC=2C1=NC=CC=C1C(=NC=2/C3=N/N=C(O3)C/C4=C/C=C(/[F])C=C4)NC(=O)C(=O)OCC                                | 1.519 | 0.768 | +++ | +++ | 13.414 |
| HT188 | OC=2C1=NC=CC=C1C(=NC=2/C3=N/N=C(O3)C/C4=C/C=C(/[F])C=C4)N(C)C(=O)C(=O)N(C)C                           | 1.929 | 1.904 | +++ | +++ | 13.403 |
| HT189 | OC=2C1=NC=CC=C1C(=NC=2/C3=N/N=C(O3)C/C4=C/C=C(/[F])C=C4)N5CCNCC5=O                                    | 1.580 | 0.837 | +++ | +++ | 13.346 |
| HT190 | OC=2C1=NC=CC=C1C(=NC=2/C3=N/N=C(O3)C/C4=C/C=C(/[F])C=C4)C5=CC(N)=CC=C5                                | 1.176 | 0.772 | +++ | +++ | 13.411 |
| HT191 | OC=2C1=NC=CC=C1C(=NC=2/C3=N/N=C(O3)C/C4=C/C=C(/[F])C=C4)C5=CC(=CC=C5)NC(=O)C                          | 1.903 | 1.893 | +++ | +++ | 13.408 |
| HT192 | OC=2C1=NC=CC=C1C(=NC=2/C3=N/N=C(O3)C/C4=C/C=C(/[F])C=C4)C5=CC(=CC=C5)N[S](C)(=O)=O                    | 0.903 | 0.778 | +++ | +++ | 13.405 |
| HT193 | OC=2C1=NC=CC=C1C(=NC=2/C3=N/N=C(O3)C/C4=C/C=C(/[F])C=C4)C5=CC=C(C=C5)[S](=O)(=O)NC(C)(C)[H]           | 0.602 | 0.777 | +++ | +++ | 13.405 |
| HT194 | OC=2C1=NC=CC=C1C(=NC=2/C3=N/N=C(O3)C/C4=C/C=C(/[F])C=C4)N5CCN(C)[S]5(=O)=O                            | 0.602 | 0.957 | +++ | +++ | 13.225 |
| HT195 | OC=2C1=NC=CC=C1C(=NC=2/C3=N/N=C(O3)C/C4=C/C=C(/[F])C=C4)N[S](=O)(=O)C5=C/C=C(/C)C=C5                  | 1.623 | 1.559 | +++ | +++ | 13.412 |
| HT196 | OC=2C1=NC=CC=C1C(=NC=2/C3=N/N=C(O3)C/C4=C/C=C(/[F])C=C4)N5CCNC(=O)C5                                  | 0.845 | 0.774 | +++ | +++ | 13.409 |
| HT197 | OC=2C1=NC=CC=C1C(=NC=2/C3=N/N=C(O3)C/C4=C/C=C(/[F])C=C4)NC                                            | 1.869 | 0.968 | +++ | +++ | 13.215 |
| HT198 | OC=2C1=NC=CC=C1C(=NC=2/C3=N/N=C(O3)C/C4=C/C=C(/[F])C=C4)N5CCN(CC5)[S](C)(=O)=O                        | 1.279 | 0.775 | +++ | +++ | 13.407 |
| HT199 | OC=2C1=NC=CC=C1C(=NC=2/C3=N/N=C(O3)C/C4=C/C=C(/[F])C=C4)N5CCN(CC5)CC(=O)N(C)C                         | 1.079 | 0.781 | +++ | +++ | 13.401 |
| HT200 | OC=2C1=NC=CC=C1C(=NC=2/C3=N/N=C(O3)C/C4=C/C=C(/[F])C=C4)C5=CC=CC=C5                                   | 1.462 | 1.435 | +++ | +++ | 13.407 |
| HT201 | OC=2C1=NC=CC=C1C(=NC=2/C3=N/N=C(O3)C/C4=C/C=C(/[F])C=C4)N[S](=O)(=O)N(C)C                             | 1.176 | 0.776 | +++ | +++ | 13.406 |
| HT202 | OC=2C1=NC=CC=C1C(=NC=2/C3=N/N=C(O3)C/C4=C/C=C(/[F])C=C4)N5CCCN(C)[S]5(=O)=O                           | 0.778 | 0.823 | +++ | +++ | 13.359 |
| HT203 | OC=2C1=NC=CC=C1C(=NC=2/C3=N/N=C(O3)C/C4=C/C=C(/[F])C=C4)N4                                            | 3.663 | 3.653 | +   | +   | 13.375 |
| HT204 | OC=2C1=NC=CC=C1C(=NC=2/C3=N/N=C(O3)C/C4=C/C=C(/[F])C=C4)C(=O)NCCOC                                    | 2.279 | 2.114 | ++  | ++  | 13.618 |
| HT205 | O=C2N1C[S]C[C@@]1([H])C(=O)[S]C=3C=CC([Cl])=CC2=3                                                     | 5.199 | 5.329 | +   | +   | 8.853  |
| HT206 | O=C3N1C[S]C[C@@]1([H])C(=O)[S]C=4C=C2C=CC=CC2=CC3=4                                                   | 5.000 | 5.457 | +   | +   | 8.726  |
| HT207 | O=C2N1CC[S][C@@]1([H])C(=O)[S]C=3C=CC([Cl])=CC2=3                                                     | 5.179 | 5.486 | +   | +   | 8.697  |
| HT208 | O=C2N1C[S]C[C@@]1([H])C(=O)[S]C=3C=CC([Br])=CC2=3                                                     | 4.940 | 5.328 | +   | +   | 8.854  |
| HT209 | O=C2N1[C@@]([H])([S]C[C@@]1([H])C[S]C=3C=C=C=CC2=3)C4=CC=CC=C4                                        | 5.571 | 5.124 | +   | +   | 9.058  |
| HT210 | O=C2N1C[S](=O)C[C@@]1([H])C(=O)[S]C=3C=CC=CC2=3                                                       | 5.301 | 5.254 | +   | +   | 8.929  |
| HT211 | O=C2N1C[S]C[C@@]1([H])C(=O)[S]C=3C=CC(C)=CC2=3                                                        | 4.716 | 5.277 | +   | +   | 8.905  |
| HT212 | O=C2N1CC[S][C@]1([H])C(=O)[S]C=3C=CC([Br])=CC2=3                                                      | 4.681 | 5.481 | +   | +   | 8.701  |
| HT213 | O=C2N1CC[S][C@@]1([H])C(=O)[S]C=3C=CC(C)=CC2=3                                                        | 4.740 | 5.474 | +   | +   | 8.708  |
| HT214 | O=C(OC)[C@]([H])(NC(=O)C=CC=1/C=C(/OC(=O)C)C(OC(=O)C)=CC=1)COC(=O)C=CC=2/C=C(/OC(=O)C)C(OC(=O)C)=CC=2 | 3.398 | 3.268 | +   | +   | 13.514 |
| HT215 | O=C(OC)[C@]([H])(NC(=O)C=CC=1/C=C(/OC(=O)C)C(OC(=O)C)=CC=1)CNC(=O)C=CC=2/C=C(/OC(=O)C)C(OC(=O)C)=CC=2 | 4.037 | 3.980 | +   | +   | 13.537 |
| HT216 | O=C(O)[C@]([H])(OC(=O)C=CC=1/C=C(/OC(=O)C)C(OC(=O)C)=CC=1)COC(=O)C=CC=2/C=C(/OC(=O)C)C(OC(=O)C)=CC=2  | 3.322 | 3.245 | +   | +   | 13.594 |

|       |                                                                                                                        |       |       |    |     |        |
|-------|------------------------------------------------------------------------------------------------------------------------|-------|-------|----|-----|--------|
| HT217 | O/C1=C/C=C(/C=C1/O)C=CC(=O)O[C@@]([H])(C(O)=O)[C@@]([H])(OC(=O)C=C/C2=C/C(/O)C(O)=C2)C(O)=O                            | 2.903 | 2.680 | ++ | ++  | 13.623 |
| HT218 | O=C2N1CCCC[C@@]1([H])C(=O)[S]C=3C=CC=CC2=3                                                                             | 5.609 | 5.411 | +  | +   | 8.772  |
| HT219 | O=C(O)[C@@]([H])(OC(=O)C=CC=1/C=C(/OC(=O)C)C(OC(=O)C)=CC=1)[C@@]([H])(OC(=O)C=CC=2/C=C(/OC(=O)C)C(OC(=O)C)=CC=2)C(=O)O | 3.663 | 3.601 | +  | +   | 13.628 |
| HT220 | O=C(OC)[C@@]([H])(OC(=O)C=CC=1/C=C(/OC(=O)C)C(OC(=O)C)=CC=1)COC(=O)C=CC=2/C=C(/OC(=O)C)C(OC(=O)C)=CC=2                 | 4.004 | 4.995 | +  | +   | 13.622 |
| HT221 | O=C(O)[C@@]1([H])CCCC[C@@]1([H])OC(=O)C=CC=2/C=C(/O)C(O)=CC=2)C=CC=3/C=C(/O)C(O)=CC=3                                  | 3.881 | 3.717 | +  | +   | 12.881 |
| HT222 | O=C(OC)[C@@]([H])(NC(=O)C=CC=1/C=C(/OC(=O)C)C(OC(=O)C)=CC=1)COC(=O)C=CC=2/C=C(/OC(=O)C)C(OC(=O)C)=CC=2                 | 3.447 | 3.405 | +  | +   | 13.514 |
| HT223 | O=C(O)[C@@]([H])(OC(=O)C=CC=1/C=C(/OC(=O)C)C(OC(=O)C)=CC=1)[C@@]([H])(OC(=O)C=CC=2/C=C(/OC(=O)C)C(OC(=O)C)=CC=2)C(=O)O | 3.792 | 3.793 | +  | +   | 13.628 |
| HT224 | O=C(O)[C@@]([H])(NC(=O)C)COC(=O)C=CC=1/C=C(/O)C(O)=CC=1                                                                | 5.045 | 6.098 | +  | +   | 13.633 |
| HT225 | O=C(/C=C/C=1/C=C(/O)C(O)=CC=1)OCCOC(=O)C=CC=2/C=C(/O)C(O)=CC=2                                                         | 3.875 | 3.838 | +  | +   | 12.921 |
| HT226 | O=C(OC)[C@@]([H])(NC(=O)C=CC=1/C=C(/OC(=O)C)C(OC(=O)C)=CC=1)COC(=O)C=CC=2/C=C(/OC(=O)C)C(OC(=O)C)=CC=2                 | 3.447 | 3.398 | +  | +   | 13.514 |
| HT227 | O=C(/C=C/C=1/C=C(/OC(=O)C)C(OC(=O)C)=CC=1)NCCOC(=O)C=C/C2=C/C(OC(=O)C)=C(OC(=O)C)C=C2                                  | 5.000 | 5.940 | +  | +   | 13.607 |
| HT228 | O/C1=C/C=C(/C=C1/O)C=CC(=O)O[C@@]([H])(C(O)=O)[C@@]([H])(OC(=O)C=C/C2=C/C(/O)C(O)=C2)C(=O)O                            | 2.699 | 2.732 | ++ | ++  | 13.623 |
| HT229 | O=C(O)[C@@]([H])(NC(=O)C=CC=1/C=C(/O)C(O)=CC=1)COC(=O)C=CC=2/C=C(/O)C(O)=CC=2                                          | 3.230 | 3.132 | +  | +   | 13.620 |
| HT230 | O=C(O)[C@@]([H])(OC(=O)C=CC=1/C=C(/O)C(O)=CC=1)COC(=O)C=CC=2/C=C(/O)C(O)=CC=2                                          | 3.623 | 0.541 | +  | +++ | 13.642 |
| HT231 | O=C2N1C[S]C[C@@]1([H])C(=O)[S]C=3C=CC=CC2=3)OC                                                                         | 5.190 | 5.125 | +  | +   | 9.057  |
| HT232 | O=C2N1C[S](=O)C[C@@]1([H])C(=O)[S]C=3C=CC([C])=CC2=3                                                                   | 5.447 | 5.247 | +  | +   | 8.935  |
| HT233 | O=C(O)[C@@]([H])(NC(=O)C=CC=1/C=C(/OC(=O)C)C(OC(=O)C)=CC=1)CNC(=O)C=CC=2/C=C(/OC(=O)C)C(OC(=O)C)=CC=2                  | 3.613 | 0.538 | +  | +++ | 13.645 |
| HT234 | O=C(/C=C/C=1/C=C(/O)C(O)=CC=1)OCCOC(=O)C=CC=2/C=C(/O)C(O)=CC=2                                                         | 2.602 | 2.301 | ++ | ++  | 12.921 |
| HT235 | O=C2N1C[S]C[C@@]1([H])C(=O)[S]C=3/C=C(/OC)C(=CC2=3)OC                                                                  | 5.522 | 5.143 | +  | +   | 9.040  |
| HT236 | O=C2N1C[S]C[C@@]1([H])C(=O)[S]C=3C=CC=CC2=3                                                                            | 5.318 | 5.471 | +  | +   | 8.712  |
| HT237 | O=C2N1C[S](=O)C[C@@]1([H])C(=O)[S]C=3C=CC(=C2=3)OC                                                                     | 5.152 | 5.150 | +  | +   | 9.033  |
| HT238 | O=C2[S]C=1C=CC=CC=1CN3C=CC=C23[O-                                                                                      | 5.771 | 7.534 | +  | +   | 6.648  |
| HT239 | ][N+](=O)C3=CC=2[S]C(=O)[C@@]1([H])C[S]CN1C(=O)C=2C=C3                                                                 | 5.000 | 5.123 | +  | +   | 9.060  |
| HT240 | O=C3N1CC[S][C@@]1([H])C(=O)[S]C=4C=C2C=CC=CC2=CC3=4                                                                    | 4.602 | 5.489 | +  | +   | 8.693  |
| HT241 | O=C2N1CC[S](=O)[C@@]1([H])C(=O)[S]C=3C=CC(C)=CC2=3                                                                     | 5.771 | 5.102 | +  | +   | 9.080  |
| HT242 | O=C2N1CC[S][C@@]1([H])C(=O)[S]C=3C=CC=CC2=3                                                                            | 5.164 | 5.577 | +  | +   | 8.606  |
| HT243 | O/C3=C/C=C(/C=C/C2=N/C1=C(\O)C(=CC=C1C=C2)C(O)=O)C=C3                                                                  | 3.204 | 5.077 | +  | +   | 9.105  |
| HT244 | ][N+](=O)C=3C=CC(/C=C/C2=N/C1=C(\O)C(=CC=C1C=C2)C(=O)O)=CC=3                                                           | 3.079 | 5.077 | +  | +   | 9.105  |
| HT245 | O/C3=C/C=C(/C=C/C2=N/C1=C(\O)C(=CC=C1C=C2)C(O)=O)C(O)=C3                                                               | 3.447 | 3.932 | +  | +   | 10.251 |
| HT246 | OC=1C(=CC=C2C=CC(=NC=12)C=C/C3=C/C=CO3)C(O)=O                                                                          | 3.279 | 5.076 | +  | +   | 9.106  |
| HT247 | OC=1C(=CC=C2C=CC(=NC=12)C=C/C3=C/C=CN=C3)C(O)=O                                                                        | 3.613 | 5.077 | +  | +   | 9.105  |
| HT248 | O=C(O)C2=CC=C1C=CC(=N/C1=C2\O)C=C/C3=C/[S]C=C3                                                                         | 3.477 | 5.076 | +  | +   | 9.106  |
| HT249 | O/C3=C/C/C=C/C2=N/C1=C(\O)C(=CC=C1C=C2)C(O)=O)C=C/C3/OC                                                                | 2.954 | 5.053 | +  | +   | 9.130  |

|       |                                                                                                  |       |       |     |     |        |
|-------|--------------------------------------------------------------------------------------------------|-------|-------|-----|-----|--------|
| HT250 | O/C3=C(/C=C(/C=C/C2=N/C1=C(\O)C(=CC=C1C=C2)C(O)=O)C=C3OC)OC                                      | 3.690 | 3.597 | +   | +   | 11.448 |
| HT251 | O=C(O)C2=CC=C1C=CC(=N/C1=C2\O)C=CC=3/C=C(/O)C(O)=C(O)C=3                                         | 2.602 | 1.898 | +   | ++  | 12.285 |
| HT252 | O/C3=C(/C=C(/C=C/C2=N/C1=C(\O)C(=CC=C1C=C2)C(O)=O)C=C3O)OC                                       | 3.230 | 2.164 | +   | ++  | 12.019 |
| HT253 | O=C(O)C2=CC=C1C=CC(=N/C1=C2\O)CCC=3/C=C(/O)C(O)=CC=3                                             | 3.176 | 3.185 | +   | +   | 13.361 |
| HT254 | O=C(O)C2=CC=C1C=CC(=N/C1=C2\O)C=C/C3=C/C=C(/NC(=O)C)C=C3                                         | 3.146 | 5.077 | +   | +   | 9.105  |
| HT255 | OC=1C(=CC=C2C=CC(=NC=12)C=C/C3=C/C([Br])=C(O)C([Br])=C3)C(O)=O                                   | 3.114 | 5.077 | +   | +   | 9.105  |
| HT256 | O/C3=C(\[I])C=C(/C=C/C2=N/C1=C(\O)C(=CC=C1C=C2)C(O)=O)C=C3O                                      | 3.602 | 3.462 | +   | +   | 11.283 |
| HT257 | O=C(O)C2=CC=C1C=CC(=N/C1=C2\O)C=CC=3/C=C(/OC)C(O)=CC=3                                           | 3.568 | 3.538 | +   | +   | 10.644 |
| HT258 | O/C3=C/C=C(/C=C/C2=N/C1=C(\O)C(=CC=C1C=C2)C(O)=O)C=C3O                                           | 3.380 | 2.514 | +   | ++  | 11.669 |
| HT259 | O=C(O)C2=CC=C1C=CC(=N/C1=C2\O)C=C/C3=C/C(O)=CC(O)=C3                                             | 3.505 | 1.891 | +   | +++ | 12.291 |
| HT260 | O=C(O)C2=CC=C1C=CC(=N/C1=C2\O)C=C/C3=C/C=CC=C3                                                   | 3.724 | 5.077 | +   | +   | 9.105  |
| HT261 | OC=1C(=CC=C2C=CC(=NC=12)C=C/C3=C/C=C(N)C=C3)C(O)=O                                               | 3.342 | 5.077 | +   | +   | 9.105  |
| HT262 | O=C(O)C(=O)CC(=O)C2=CC(C/C1=C/C=C(/[Cl])C=C1)=CC=C2                                              | 2.699 | 2.554 | ++  | ++  | 13.584 |
| HT263 | O=C(O)C(=O)CC(=O)C=1[S]C(=CC=1)C/C2=C/C=CC=C2                                                    | 2.699 | 2.544 | ++  | ++  | 13.533 |
| HT264 | O=C(CC(=O)C(=O)O)C=1C=CC=CC=1C/C2=C/C=CC=C2                                                      | 3.754 | 3.686 | +   | +   | 13.357 |
| HT265 | O=C(CC(=O)C(=O)O)C1=CC=CN1C/C2=C/C=CC=C2                                                         | 2.342 | 2.299 | ++  | ++  | 13.344 |
| HT266 | O=C(O)C(=O)CC(=O)C1=CN(C=C1)C/C2=C/C=CC=C2                                                       | 2.699 | 2.485 | ++  | ++  | 13.599 |
| HT267 | O=C(CC(=O)C(=O)O)C=1C=C[S]C=1C/C2=C/C=CC=C2                                                      | 2.255 | 2.244 | ++  | ++  | 13.398 |
| HT268 | O=C(O)C(=O)CC(=O)C=2/C=C(/C/C1=C/C=CC=C1)C(=CC=2)OC                                              | 2.176 | 1.997 | ++  | +++ | 13.615 |
| HT269 | O=C(O)C(=O)CC(=O)C=1C=C([S]C=1)C/C2=C/C=CC=C2                                                    | 2.204 | 2.176 | ++  | ++  | 13.564 |
| HT270 | O=C(C=2OC1=CC=CN=C1C=2O)C4=CC(C/C3=C/C=CC=C3)=CC=C4                                              | 3.000 | 0.928 | +   | +++ | 13.254 |
| HT271 | O=C(C=2/C=C(/CC=1C=CC=CC=1)C=C(C=2)CN3CC C[S]3(=O)=O)C5=NC=C4C=CC=N/C4=C5\O                      | 1.000 | 0.557 | +++ | +++ | 13.626 |
| HT272 | O=C(/C1=C/C(=CC=C1)CC=2C=CC=CC=2)C4=NC=C3C=CC=N/C3=C4\O                                          | 1.602 | 1.646 | +++ | +++ | 13.411 |
| HT273 | O=C(/C1=C/C(=CC=N1)CC=2C=CC=CC=2)C4=CC=C3C=CC=N/C3=C4\O                                          | 1.699 | 0.672 | +++ | +++ | 13.511 |
| HT274 | O=C4NNC(=O)C=1C=CC=CC=1[S][S]C=2C=CC=CC=2C(=O)NNC(=O)C=3C=CC=CC=3[S][S]C=5C=CC=CC4=5             | 3.845 | 5.144 | +   | +   | 9.038  |
| HT275 | O=C(NNC(=O)C=1C=CC=CC=1[S])C=2C=CC=CC=2[S]                                                       | 4.301 | 5.015 | +   | +   | 9.168  |
| HT276 | O=C(NNC(=O)C=1C=CC=CC=1[S])C=2C=CC=CC=2[S][S]C=3C=CC=CC=3C(=O)NNC(=O)C=4C=CC=CC=4[S]             | 4.041 | 4.928 | +   | +   | 13.572 |
| HT277 | O=C(/C2=C/C=C1C=CC=N/C1=C2\O)C4=CC(C/C3=C/C=CC=C3)=CC=C4                                         | 2.568 | 2.591 | ++  | ++  | 13.331 |
| HT278 | O=C1C=4C(OC2=CC=C(C=C12)C/C3=C/C=CC=C3)=C/C=C(/O)C=4O                                            | 2.778 | 2.512 | ++  | ++  | 12.940 |
| HT279 | O=C(O)C(=O)CC(=O)C3=CC(OCC=1C=CC=CC=1CO C=2C=C(C=CC=2)C(=O)CC(=O)C(=O)O)=CC=C3                   | 3.255 | 3.182 | +   | +   | 13.636 |
| HT280 | O=C(O)C(=O)CC(=O)C2=CC(CC=1C=CC=CC=1[F])=CC=C2                                                   | 3.398 | 3.268 | +   | +   | 13.560 |
| HT281 | O=C(NCCNC(=O)C(=O)CC(=O)C2=CC(CC=1C=CC=CC=1[F])=CC=C2)C(=O)CC(=O)C4=CC(CC=3C=CC=CC=3[F])=CC=C4   | 3.763 | 3.628 | +   | +   | 13.600 |
| HT282 | O=C(O)C(=O)CC(=O)C=1C=C(C=C=1)C([H])(C2=C(C=CC=C2)C(=O)CC(=O)C(=O)O)C=3C=CC=CC=3[F]              | 3.255 | 3.147 | +   | +   | 13.632 |
| HT283 | O=C(NCCCCNC(=O)C(=O)CC(=O)C2=CC(CC=1C=CC=CC=1[F])=CC=C2)C(=O)CC(=O)C4=CC(CC=3C=CC=CC=3[F])=CC=C4 | 3.681 | 3.716 | +   | +   | 13.652 |
| HT284 | O=C(NCCCCNC(=O)C(=O)CC(=O)C2=CC(CC=1C=CC=CC=1[F])=CC=C2)C(=O)CC(=O)C4=CC(CC=3C=CC=CC=3[F])=CC=C4 | 2.301 | 2.256 | ++  | ++  | 13.651 |





|       |                                                                                                |       |       |     |     |        |
|-------|------------------------------------------------------------------------------------------------|-------|-------|-----|-----|--------|
|       | $C(=O)O)CC=4C=C(C(NC(=O)C=3C=C(C=CC=3)[N+]($<br>$[O-])=O)=CC=4)C(=O)O$                         |       |       |     |     |        |
| HT323 | $O=C(N/N=C(\backslash)CC(=O)N/C1=C(\backslash)C=C(C)C=C1)C$<br>$=2C=CC(O)=CC=2O$               | 5.176 | 5.148 | +   | +   | 13.336 |
| HT324 | $O/C1=C(/C(=C)N/C1=C/C=2OC(=CC=2)CNC(=O)C(=$<br>$O)N/C3=C/C=C(/C)C=C3)C(=O)OC$                 | 4.908 | 4.815 | +   | +   | 13.018 |
| HT325 | $O=C(CC(=O)C(=O)OCC)C2=CN(C/C1=C/C=C(/[F])C=$<br>$C1)C3=CC=CC=C23$                             | 3.079 | 3.097 | +   | +   | 13.548 |
| HT326 | $[Cl]C=1C=C2C(=CC=1)N/C=C2/C(=O)CC(=O)C(=O)$<br>$O$                                            | 2.716 | 2.350 | ++  | ++  | 12.202 |
| HT327 | $O=C(CC(=O)C=1NC=NN=1)C2=CNC3=C/C=C(/[Cl])$<br>$C=C23$                                         | 3.301 | 3.050 | +   | +   | 12.077 |
| HT328 | $O=C2OC1=CC(O)=C(O)C=C1/C=C2/OC=3C=CC(/C=$<br>$C/C(=O)O)=CC=3O$                                | 3.301 | 3.093 | +   | +   | 11.090 |
| HT329 | $O=C2OC1=CC(O)=C(O)C=C1/C=C2/OC=3/C=C(/C=C$<br>$/C(=O)O)C=CC=3O$                               | 3.000 | 3.093 | +   | +   | 11.090 |
| HT330 | $O=C2OC1=CC(O)=C(O)C=C1/C=C2/O$                                                                | 3.301 | 5.691 | +   | +   | 8.492  |
| HT331 | $O=C(CC(=O)C(=O)OCC)C2=CN(C/C1=C/C=C(/[F])C=$<br>$C1)C3=CC=C(C=C23)OC$                         | 5.116 | 5.084 | +   | +   | 13.558 |
| HT332 | $O=C(OC(C)(C)[H])C(=O)CC(=O)C1=CC=CN1C/C2=C$<br>$/C=C(/[F])C=C2$                               | 5.000 | 4.984 | +   | +   | 13.325 |
| HT333 | $O=C(CC(=O)C(=O)OCC)C2=CN(C/C1=C/C=CC=C1)C$<br>$3=CC=C(C=C23)OC$                               | 2.176 | 0.570 | ++  | +++ | 13.613 |
| HT334 | $O=C(O)C(=O)CC(=O)C1=CC=C(C=C1)C(=O)CC(=O)$<br>$C(=O)O$                                        | 3.107 | 3.271 | +   | +   | 10.911 |
| HT335 | $O=C(NC=1C=C(C=CC=1)C(=O)CC(=O)C(=O)O)C2=C$<br>$C=CC=C2$                                       | 4.544 | 4.455 | +   | +   | 13.629 |
| HT336 | $O=C(CC(=O)C(=O)O)C2=CN(C/C1=C/C=CC=C1)C3=$<br>$C/C=C(/[Cl])C=C23$                             | 2.987 | 3.036 | ++  | +   | 13.634 |
| HT337 | $O=C(CC(=O)C(=O)O)C2=CN(C/C1=C/C=C(/[F])C=C1$<br>$)C3=C/C=C(/[Cl])C=C23$                       | 2.301 | 2.182 | ++  | ++  | 13.509 |
| HT338 | $O=C(CC(=O)C(=O)O)C2=CN(C/C1=C/C=CC=C1)C3=$<br>$CC=C(C=C23)OC$                                 | 3.334 | 3.268 | +   | +   | 13.628 |
| HT339 | $O=C(CC(=O)C(=O)O)C1=CNC2=CC=CC=C12$                                                           | 3.155 | 1.910 | +   | ++  | 12.273 |
| HT340 | $O=C(CC(=O)C(=O)O)C2=CN(C/C1=C/C=C(/[F])C=C1$<br>$)C3=CC=C(C=C23)OC$                           | 0.602 | 0.647 | +++ | +++ | 13.536 |
| HT341 | $O=C(CC(=O)C(=O)OCC)C2=CN(C/C1=C/C=C(/[F])C=$<br>$C1)C3=C/C=C(/[Cl])C=C23$                     | 2.591 | 2.549 | ++  | ++  | 13.524 |
| HT342 | $O=C(CC(=O)C(=O)O)C=1C=CN=C2C=CC=CC=12$                                                        | 5.000 | 4.777 | +   | +   | 12.037 |
| HT343 | $O=C(O)C(=O)CC(=O)C2=C/C=C(/O/C1=C/C=CC=C1)$<br>$C=C2$                                         | 4.057 | 4.011 | +   | +   | 13.465 |
| HT344 | $O=C(CC(=O)C(=O)OCC)C2=CN(C/C1=C/C=CC=C1)C$<br>$3=C/C=C(/[Cl])C=C23$                           | 4.008 | 3.952 | +   | +   | 13.507 |
| HT345 | $O=C1NC(=O)C[C@@]([H])(N1)C=2N=C(C(O)=C3N=$<br>$CC=CC=23)C(=O)NCC=4C=CC([F])=CC=4$             | 1.000 | 0.625 | +++ | +++ | 13.558 |
| HT346 | $O=C1N(C)C(=O)C[C@]([H])(N1C)C=2N=C(C(O)=C3$<br>$N=CC=CC=23)C(=O)NCC=4C=CC([F])=CC=4$          | 1.544 | 0.700 | +++ | +++ | 13.483 |
| HT347 | $O/C4=N/C(=O)C[C@]([H])(C=1N=C(C(O)=C2N=C$<br>$C=CC=12)C(=O)NCC=3C=CC([F])=CC=3)N4C$           | 1.097 | 0.700 | +++ | +++ | 13.483 |
| HT348 | $O=C(CC(=O)C(=O)CC)C1=CNC2=C/C=C(/[Cl])C=C1$<br>$2$                                            | 3.839 | 3.719 | +   | +   | 12.271 |
| HT349 | $O=C(CC(=O)C(=O)OCC)C2=CN(C/C1=C/C=CC=C1)C$<br>$3=CC=CC=C23$                                   | 2.881 | 2.892 | ++  | ++  | 13.374 |
| HT350 | $O=C(CC(=O)C(=O)O)C=2/C=C(/C/C1=C/C=CC=C1)C$<br>$=CC=2OC$                                      | 2.000 | 1.834 | ++  | +++ | 13.540 |
| HT351 | $O=C(O)C(=O)CC(=O)C2=CC(OC/C1=C/C=CC=C1)=C$<br>$C=C2$                                          | 2.544 | 2.477 | ++  | ++  | 13.615 |
| HT352 | $O=C(NC=2N=C(C(O)=C1N=CC=CC1=2)C(=O)NCC=$<br>$3C=CC([F])=CC=3)C(=O)N$                          | 1.602 | 0.869 | +++ | +++ | 13.314 |
| HT353 | $O=C(CC(=O)C(=O)O)C2=CN(C/C1=C/C=C(/[F])C=C1$<br>$)C3=CC=CC=C23$                               | 1.176 | 0.664 | +++ | +++ | 13.518 |
| HT354 | $O=C(CC(=O)C(=O)OCCCC)C1=CC=CN1C/C2=C/C=C$<br>$(/[F])C=C2$                                     | 5.000 | 5.134 | +   | +   | 12.900 |
| HT355 | $O=C(O)C(=O)CC(=O)C1=CC=CC=C1$                                                                 | 4.384 | 3.587 | +   | +   | 10.595 |
| HT356 | $O=C(O)C(=O)CC(=O)C=1C=C(C=CC=1)C(=O)CC(=O)$<br>$C(=O)O$                                       | 3.255 | 3.252 | +   | +   | 10.931 |
| HT357 | $O=C(CC(=O)C=1NN=NN=1)C2=CNC3=CC=CC=C23$                                                       | 3.290 | 3.094 | +   | +   | 12.150 |
| HT358 | $O=C(O)C(=O)CC(=O)C1=CC([Br])=CC=C1$                                                           | 3.398 | 3.602 | +   | +   | 10.580 |
| HT359 | $CC=1C=CC(=CC=1)[S](=O)(=O)N/C2=C/C=C/C2/$<br>$N=C/C=4[S]C3=CC=CC=C3C=4O$                      | 4.944 | 4.932 | +   | +   | 13.239 |
| HT360 | $O=C(CC(=O)C=2N=CN=C1N(C=NC1=2)C/C3=C/C=C$<br>$C=C3)C(=O)O$                                    | 5.898 | 5.903 | +   | +   | 13.506 |
| HT361 | $O=C(N/C(=C\C=C\C=C\C=C=CC=C1)C(=O)N=N/C2=C($<br>$\backslash)NC3=C/C=C(/[F])C=C23)C4=CC=CC=C4$ | 4.778 | 4.742 | +   | +   | 13.397 |
| HT362 | $O=C(NC=1C=CC(O)=C(C=1)C3=NC2=CC([Cl])=CC=$                                                    | 4.000 | 4.952 | +   | +   | 11.918 |

| ID    | Chemical Structure                                                                        | 4.973 | 5.076 | +  | +   | 9.106  |
|-------|-------------------------------------------------------------------------------------------|-------|-------|----|-----|--------|
| HT363 | O=C(OCC)C1=CC(CCC(=O)OCC)=C(/C=C1/CCC(=O)OCC)C(=O)OCC                                     | 4.973 | 5.076 | +  | +   | 9.106  |
| HT364 | O=C(N/C1=C/C=C(O)C(=C1)C3=NC2=CC=CC=C2O3)C=4C=CC=C5C=CC=CC=45                             | 4.146 | 3.952 | +  | +   | 11.893 |
| HT365 | O/C1=C/C=C(/C=C1/OC)C/N=N/C2=N/C(O)=C([S]2)C C(=O)N/C3=C/C=C(/[Cl])C([Cl])=C3             | 4.949 | 4.902 | +  | +   | 13.480 |
| HT366 | C/C1=N/N(C(O)=C1[C@]([H])(C2=C/C=C(/O)C(O)=C2)C=3C(=O)N(N(C)C=3C)C4=CC=CC=C4)C5=CC=C C=C5 | 4.949 | 5.042 | +  | +   | 12.289 |
| HT367 | O=C2N(CC(C)(C)[H])C1=CC=CC=C1C(O)=C2C(=O) NC=3C=CC=CC=3[S](=O)(=O)N                       | 4.602 | 4.512 | +  | +   | 12.372 |
| HT368 | C[S](=O)(=O)N(CC(=O)N/N=C/C=1C(O)=CC=C2C=C C=CC=12)C=3/C=C(/[Cl])C(=CC=3)OC               | 4.771 | 4.786 | +  | +   | 13.369 |
| HT369 | [Cl]C=1C=CC(=CC=1)[C@]3([H])N(CCC/C2=C/N=CN2)C(=O)C(=O)[C@]3([H])C(=O)C4=C/C=C(/C)C=C4    | 4.968 | 4.654 | +  | +   | 13.613 |
| HT370 | [Cl]C=1C=CC(=CC=1)C=CC(=O)N/C2=C/C=C(C=C2) NC(=O)C=3OC=CC=3                               | 4.954 | 5.187 | +  | +   | 8.995  |
| HT371 | O=C(CC(=O)C(O)=O)C2=NC1=CN=CN=C1N2C/C3=C/C=CC=C3                                          | 5.000 | 6.043 | +  | +   | 13.422 |
| HT372 | O=C3C=2N=CN(C/C1=C/C=CC=C1)C=2N=C(N3CC=4C=CC=CC=4)C(=O)CC(=O)C(O)=O                       | 4.477 | 4.333 | +  | +   | 13.600 |
| HT373 | O/C(=C/C(=O)C(O)=O)C3=NC2=C(N=CN(C/C1=C/C=CC=C1)C2=O)N3C/C4=C/C=CC=C4                     | 4.498 | 4.453 | +  | +   | 13.587 |
| HT374 | O=C2N(C/C1=C/C=C/C1/[F])C(=O)N(/C=C2/C(O)=CC(=O)C(O)=O)CC=3C=CC=CC=3[F]                   | 3.613 | 3.513 | +  | +   | 13.635 |
| HT375 | O=C2N(C/C1=C/C=C(/[F])C=C1)C(=O)N(/C=C2/C(O)=CC(=O)C(O)=O)C/C3=C/C=C(/[F])C=C3            | 3.591 | 0.540 | +  | +++ | 13.643 |
| HT376 | O=C2N(C/C1=C/C=CC=C1)C(=O)N(/C=C2/C(O)=CC(=O)C(O)=O)C/C3=C/C=CC=C3                        | 2.301 | 0.538 | ++ | +++ | 13.644 |
| HT377 | O=C1NC(=O)N(/C=C1/C(=O)CC(=O)C(O)=O)C/C2=C /C=CC=C2                                       | 2.699 | 2.602 | ++ | ++  | 13.636 |
| HT378 | O=C(N/C1=C/C=C(/[Cl])C=C1[Cl])C[S]/C3=N/C(C[S]/C2=C/C=C(/[Cl])C=C2)=CC(=O)N3              | 4.380 | 4.312 | +  | +   | 13.323 |
| HT379 | O=C(NC=1C=CC=C(C=1)[N+](=O)[O-])CC(=O)C=3[S]C(N/C2=C/C=CC=C2)=C(C=3)C(=O)C                | 4.987 | 5.955 | +  | +   | 13.619 |
| HT380 | O=C(N/C(=C\C=C\C=C\C=C=CC=C1)C(=O)N/N=C/C2=C/C([Br])=C/C=C2/O)C3=CC=CC=C3                 | 4.954 | 4.819 | +  | +   | 12.899 |
| HT381 | O=C(NC=1C=CC=C(C=1)N(C(=O)CC(=O)C=3[S]C(N/C2=C/C=CC=C2)=C(C=3)C(=O)C                      | 4.903 | 4.978 | +  | +   | 13.609 |
| HT382 | O/C1=C/C=C/C=C1/NC(=[S])NC(=O)C=CC=2OC=CC=2                                               | 4.447 | 4.333 | +  | +   | 12.117 |
| HT383 | O=C(OCC)C1=C([S]/C=C1/C2=C/C=C=CC=C2)N[C@]([H])(NC(=O)C=3OC=CC=3)C(=O)C4=C/C=C(/C)C=C4    | 4.898 | 4.877 | +  | +   | 13.392 |
| HT384 | O=C(C=1C=CC=CC=1)C2=CC([Br])=C/C=C2/NC(=O)C=3NC=NC=3C(O)=O                                | 4.230 | 4.271 | +  | +   | 13.589 |
| HT385 | O=C(NC=1C=CC=C(C=1)N(C(=O)CC(=O)C=3[S]C(N/C2=C/C=CC=C2)=C(C=3)C(=O)C                      | 4.944 | 5.833 | +  | +   | 13.628 |
| HT386 | O=C(NC=1C=CC(O)=C(C=1)C3=NC2=CC=CC=C2O3)C4=C/C=C(/OC)C(=C4)[N+](=O)[O-]                   | 3.845 | 2.565 | +  | ++  | 11.618 |
| HT387 | O/C1=C/C=C/C=C1/C=N/CC(O)([H])C/N=C/C2=C/C=C/C=C2/O                                       | 4.785 | 5.780 | +  | +   | 13.558 |
| HT388 | O=C(NC=1C=CC=CC=1)C5=C/C=C(/C=C/C(=O)N/C2=C/C=C(/O)C(=C2)C4=NC3=CC=CC=C3O4)O5             | 4.362 | 4.268 | +  | +   | 12.909 |
| HT389 | O=C2NC1=CC=CC=C1[S][C@]2([H])CC(=O)N/C3=C/C=CC(=C3)C(O)=O                                 | 4.851 | 4.846 | +  | +   | 13.444 |
| HT390 | [Cl]/C3=C/C(N[C@]([H])(OC)C2=N/C1=C(\O)C=CC=C1C=C2)=C([Cl])C=C3[N+](=O)[O-]               | 5.362 | 6.453 | +  | +   | 11.186 |
| HT391 | [Cl]C=3C=C/C=C(/C=C/C2=N/C1=C(\O)C=CC=C1C=C2)C=3                                          | 5.362 | 5.266 | +  | +   | 8.917  |
| HT392 | [Cl]C=3C=C/C=C(/C=C/C2=N/C1=CC(=CC=C1C=C2)C(=O)O)C=3                                      | 5.362 | 5.838 | +  | +   | 8.345  |
| HT393 | O=C(CC=1C=CC=CC=1)N/C2=C/C=C(/C=C2/C(O)=O)NC(=O)C/C3=C/C=CC=C3)C(O)=O                     | 3.954 | 3.819 | +  | +   | 13.615 |
| HT394 | O=C(CC(=O)C(=O)N=N/C1=C(\O)NC2=C/C=C(/[Br])C=C12)C3=C/C=C(/[Cl])C=C3                      | 4.447 | 4.404 | +  | +   | 13.380 |
| HT395 | OC(=O)C1=CC=C(C=C1)C(=O)C=2C=CC3=C(C=2)C(=O)N(C3=O)C=4[S]C(=NN=4)[S]CC                    | 4.813 | 4.796 | +  | +   | 13.028 |
| HT396 | O/C1=C/C=C(=CC(O)=C1)C(=O)N/N=C/C=2C=CC(=CC=2)C=NNC(=O)C3=CC(O)=CC(O)=C3                  | 4.881 | 3.376 | +  | +   | 10.806 |

|       |                                                                                                                                                                                                                                                                                                                                         |       |       |     |     |        |
|-------|-----------------------------------------------------------------------------------------------------------------------------------------------------------------------------------------------------------------------------------------------------------------------------------------------------------------------------------------|-------|-------|-----|-----|--------|
| HT397 | O=C2OC1=CC=C(C=C1/C=C2/C=3N=C([S]C=3)N=N<br>C/C4=C/C=C/C=C4/O)OC                                                                                                                                                                                                                                                                        | 4.477 | 4.400 | +   | +   | 13.018 |
| HT398 | O=C(C[S])C2=N/C1=CC=CC=C1N2C/C3=C/C=CC=C<br>3)N/N=C/C4=C/C([Br])=C/C=C4/O                                                                                                                                                                                                                                                               | 4.708 | 4.700 | +   | +   | 13.501 |
| HT399 | COC=1C=CC(=CC=1OC)CCNC(=O)CC(=O)N/N=C/C<br>=2OC=CC=2                                                                                                                                                                                                                                                                                    | 4.954 | 4.979 | +   | +   | 13.341 |
| HT400 | O=C3C(=O)N(CCN1CCNCC1)[C@]([H])(C=2C=CC=<br>CC=2[F])[C@@]3([H])C(=O)C4=CC=C(C=C4)OC                                                                                                                                                                                                                                                     | 5.799 | 3.203 | +   | +   | 10.979 |
| HT401 | O=C(NCC=1OC(=CC=1)C=C2NC(=C)C(=C2O)C(=O)<br>OCC)C(=O)NC=3C=CC=CC=3                                                                                                                                                                                                                                                                      | 4.602 | 4.629 | +   | +   | 13.256 |
| HT402 | O=C2C1=CC=CC=C1C(=O)C4=C2C(O)=CC(O/C3=C/<br>C=C(C=C3)[S](=O)(=O)NCCOC)=C4O                                                                                                                                                                                                                                                              | 5.000 | 4.988 | +   | +   | 13.279 |
| HT403 | O=C1OC=4C(/C=C1/C=3[S][C@]2([H])C=CC=C[C<br>@]2([H])N=3=C/C=C(/O)C=4CN(CCO)CCO                                                                                                                                                                                                                                                          | 5.929 | 3.041 | +   | +   | 11.142 |
| HT404 | O=C2OC1=CC=CC=C1/C=C2/C(=O)NC=3[S]/C=C(/C<br>C=3C(=O)OCC)C(N)=O                                                                                                                                                                                                                                                                         | 4.954 | 4.818 | +   | +   | 12.722 |
| HT405 | OC(=O)C2=CN(C1=CC=C(C=C1C2=O)C/C3=C/C=CC<br>([Cl])=C3[F])[C@]([H])(CO)C(C)[H]                                                                                                                                                                                                                                                           | 0.914 | 1.294 | +++ | +++ | 12.888 |
| HT406 | O=C2C1=CC(=CC=C1N/C=C2/C(O)=O)CCO)CC=3C<br>=C/C=C(/[Cl])C=3[F]                                                                                                                                                                                                                                                                          | 1.384 | 1.234 | +++ | +++ | 12.948 |
| HT407 | OC(=O)C2=CN=C1C=CC(=C/C1=C2/O)C/C3=C/C=C<br>C=C3                                                                                                                                                                                                                                                                                        | 3.204 | 3.042 | +   | +   | 13.055 |
| HT408 | OC=2C1=CC(=CC=C1N=CC=2C(O)=O)CC=3C=C/C=<br>C(/[Cl])C=3[F]                                                                                                                                                                                                                                                                               | 1.638 | 1.171 | +++ | +++ | 13.012 |
| HT409 | O=C(NC/C1=C/C=C(/[F])C=C1)C3=NC(=C2C=CC=N/<br>C2=C3\O)N4CCN(C)CC4                                                                                                                                                                                                                                                                       | 1.602 | 0.957 | +++ | +++ | 13.225 |
| HT410 | O=C(NC/C1=C/C=C(/[F])C=C1)C3=NC(=C2C=CC=N/<br>C2=C3\O)N(C)CC(=O)N(C)C                                                                                                                                                                                                                                                                   | 1.763 | 1.723 | +++ | +++ | 13.298 |
| HT411 | O=C(NC/C1=C/C=C(/[F])C=C1)C3=NC(=C2C=CC=N/<br>C2=C3\O)N(C)C(=O)C(=O)N(C)C                                                                                                                                                                                                                                                               | 1.602 | 0.951 | +++ | +++ | 13.231 |
| HT412 | O=C(NC/C1=C/C=C(/[F])C=C1)C3=NC(=C2C=CC=N/<br>C2=C3\O)N(C)C(=O)C(N)=O                                                                                                                                                                                                                                                                   | 1.301 | 0.852 | +++ | +++ | 13.331 |
| HT413 | O=C(NC/C1=C/C=C(/[F])C=C1)C3=NC(=C2C=CC=N/<br>C2=C3\O)N4CCN(CC4)C(C)=O                                                                                                                                                                                                                                                                  | 1.398 | 0.984 | +++ | +++ | 13.198 |
| HT414 | O=C(NC/C1=C/C=C(/[F])C=C1)C3=NC(=C2C=CC=N/<br>C2=C3\O)N(C)C(=O)C(=O)NC                                                                                                                                                                                                                                                                  | 1.176 | 0.847 | +++ | +++ | 13.336 |
| HT415 | O=C(NC/C1=C/C=C(/[F])C=C1)C3=NC(=C2C=CC=N/<br>C2=C3\O)N(C)CCN(C)C(C)=O                                                                                                                                                                                                                                                                  | 2.193 | 2.085 | ++  | ++  | 13.564 |
| HT416 | O=C(NC/C1=C/C=C(/[F])C=C1)C3=NC(=C2C=CC=N/<br>C2=C3\O)N(C)C(=O)C(=O)N4CCCC4                                                                                                                                                                                                                                                             | 1.602 | 0.908 | +++ | +++ | 13.275 |
| HT417 | O=C(NC/C1=C/C=C(/[F])C=C1)C3=NC(=C2C=CC=N/<br>C2=C3\O)N(C)C(=O)C(=O)N4CCCC4                                                                                                                                                                                                                                                             | 0.845 | 0.949 | +++ | +++ | 13.234 |
| HT418 | O=C(NC/C1=C/C=C(/[F])C=C1)C3=NC(=C2C=CC=N/<br>C2=C3\O)N4CCN(CC)C(=O)C4=O                                                                                                                                                                                                                                                                | 1.000 | 0.992 | +++ | +++ | 13.191 |
| HT419 | O=C3C2=CC(CC=1C=C/C=C(/[Cl])C=1[F])=C(C=C2N<br>(/C=C3/C(O)=O)[C@]([H])(CO)C(C)[H])OC                                                                                                                                                                                                                                                    | 0.857 | 1.691 | +++ | +++ | 12.492 |
| HT420 | OC(=O)C2=CN(CCO)C1=CC(OC)=C(C=C1C2=O)C/C<br>3=C/C=CC([Cl])=C3[F]                                                                                                                                                                                                                                                                        | 0.959 | 1.363 | +++ | +++ | 12.820 |
| HT421 | N[C@](C)([H])C(=O)N[C@](C)([H])C(=O)N[C@@]([<br>H])(C/C1=C/C=C(/O)C=C1)C(=O)N[C@]([H])(C/C2<br>=C/C=CC=C2)C(=O)N[C@]([H])(CC(C)C)[H])C(=O)<br>N[C@@]([H])(CC(C)C)[H])C(=O)N[C@]([H])(C<br>CCCN)C(=O)N[C@]([H])(CC(C)C)[H])C(=O)N[C@]<br>](C)([H])C(=O)NCC(=O)N[C@]([H])(CCC/N=C(N)<br>N)C(=O)N[C@]([H])(C/C3=C/NC4=CC=CC=C34)C(<br>O)=O | 5.000 | 4.844 | +   | +   | 13.212 |
| HT422 | O=C2C1=CC(=CC=C1N/C=C2/C(=O)CC(=O)C(=O)O<br>CC)C/C3=C/C=C(/[F])C=C3)C(=O)CC(=O)C(=O)OCC                                                                                                                                                                                                                                                 | 2.462 | 2.093 | ++  | ++  | 13.628 |
| HT423 | OC=2C1=CC(=CC=C1N=CC=2C(=O)CC(=O)C(=O)O<br>C(=O)CC(=O)C(O)=O                                                                                                                                                                                                                                                                            | 4.342 | 4.547 | +   | +   | 13.187 |
| HT424 | OC=2C1=CC(=CC=C1N=CC=2C(=O)CC(=O)C(=O)O<br>CC)C(=O)CC(=O)C(=O)OCC                                                                                                                                                                                                                                                                       | 4.591 | 4.522 | +   | +   | 13.175 |
| HT425 | O=C2C1=CC(=CC=C1N/C=C2/C(=O)CC(=O)C(=O)O<br>)C/C3=C/C=C(/[F])C=C3)C(=O)CC(=O)C(O)=O                                                                                                                                                                                                                                                     | 2.643 | 2.624 | ++  | ++  | 13.617 |
| HT426 | O=C2C=1C(O)=C/C=C(/O)C=1C3=NN(CCNCCO)C4=<br>C/C=C(/NCCCN)C2=C34                                                                                                                                                                                                                                                                         | 4.255 | 3.038 | +   | +   | 11.145 |
| HT427 | [F]C=5C=CC(CN3CC2=C(C1=CC=CN=C1C(O)=C2C3<br>=O)C(=O)NC/C4=C/C=CC=N4)=CC=5                                                                                                                                                                                                                                                               | 2.279 | 1.963 | ++  | +++ | 12.220 |
| HT428 | [F]/C4=C/C=C(/CN3CC2=CC1=CC=CN=C1C(O)=C2C<br>3=O)C=C4                                                                                                                                                                                                                                                                                   | 1.845 | 3.792 | +++ | +   | 10.391 |
| HT429 | [F]C=5C=CC(CN3CC2=C(C1=CC=CN=C1C(O)=C2C3<br>=O)C(=O)N4CCOCC4)=CC=5                                                                                                                                                                                                                                                                      | 1.556 | 1.066 | +++ | +++ | 13.117 |
| HT430 | N[C@](C)([H])C(=O)N[C@]([H])([S])C(=O)N[C@<br>@]([H])(C/C1=C/NC2=CC=CC=C12)C(=O)N[C@]([<br>H])(C/C3=C/NC4=CC=CC=C34)C(=O)N[C@](C)([H])                                                                                                                                                                                                  | 4.954 | 6.043 | +   | +   | 13.615 |



|       |                                                                                                                                                                                                                                                                                                                                  |       |       |     |     |  |  |        |
|-------|----------------------------------------------------------------------------------------------------------------------------------------------------------------------------------------------------------------------------------------------------------------------------------------------------------------------------------|-------|-------|-----|-----|--|--|--------|
|       | N[C@](C)([H])C(=O)NCC(=O)N[C@]([H])(C(=O)N[C@@]([H])(CCCCN)C(=O)N[C@]([H])(CCC(=O)N)C(=O)N[C@]([H])(CCC(=O)O)C(=O)N[C@]([H])(C/C3=C/C=CC=C3)C(=O)N[C@]([H])CC                                                                                                                                                                    |       |       |     |     |  |  |        |
| HT442 | N[C@]([H])(C(=O)N[C@](C)([H])C(=O)N[C@@]([H])(C/C1=C/C=C(O)C=C1)C(=O)N[C@@]([H])(C/C2=C/C=CC=C2)C(=O)N[C@@]([H])(CC(C)(C)[H])C(=O)N[C@@]([H])(CC(C)(C)[H])C(=O)N[C@@]([H])(C(=O)N[C@@]([H])(CC(C)(C)[H])C(=O)N[C@@]([H])(C(=O)NCC(=O)N[C@@]([H])(CCC/N=C(N)N)C(=O)N[C@@]([H])(C/C3=C/NC4=CC=CC=C34)C(=O)O)[C@](O)(C)[H])         | 5.053 | 6.009 | +   | +   |  |  | 13.546 |
| HT443 | N[C@@]([H])(C(=O)N[C@@](C)([H])C(=O)N[C@]([H])(C/C1=C/C=C(O)C=C1)C(=O)N[C@@]([H])(C/C2=C/C=CC=C2)C(=O)N[C@@]([H])(CC(C)(C)[H])C(=O)N[C@@]([H])(CC(C)(C)[H])C(=O)N[C@@]([H])(CCCCN)C(=O)N[C@@]([H])(CC(C)(C)[H])C(=O)N[C@@]([H])(C(=O)NCC(=O)N[C@@]([H])(CCC/N=C(N)N)C(=O)N[C@@]([H])(C/C3=C/NC4=CC=CC=C34)C(=O)N)[C@@](O)(C)[H]) | 4.114 | 3.895 | +   | +   |  |  | 13.202 |
| HT444 | N[C@](C)([H])C(=O)N[C@@]([H])(C[S])C(=O)N[C@@]([H])(C/C1=C/NC2=CC=CC=C12)C(=O)N[C@@]([H])(C/C3=C/NC4=CC=CC=C34)C(=O)N[C@@]([H])(C(=O)NCC(=O)N[C@@]([H])(C(=O)N[C@@]([H])(C(=O)N[C@@]([H])(C(=O)N[C@@]([H])(C(=O)N[C@@]([H])(C/C5=C/C=CC=C5)C(=O)O)[C@](C)([H])CC                                                                 | 4.740 | 4.765 | +   | +   |  |  | 13.584 |
| HT445 | N[C@](C)([H])C(=O)N[C@@](C)([H])C(=O)N[C@@]([H])(C/C1=C/NC2=CC=CC=C12)C(=O)N[C@@]([H])(C/C3=C/NC4=CC=CC=C34)C(=O)N[C@@]([H])(C(=O)NCC(=O)N[C@@]([H])(C(=O)N[C@@]([H])(CCCCN)C(=O)N[C@@]([H])(CCC(=O)N)C(=O)N[C@@]([H])(CCC(=O)O)C(=O)N[C@@]([H])(C/C5=C/C=CC=C5)C(=O)O)[C@](C)([H])CC                                            | 5.442 | 5.450 | +   | +   |  |  | 13.541 |
| HT446 | [F]/C4=C/C=C(/CN3C/C2=C(\OC(=O)N(C)C)C1=CC=CN=C1C(O)=C2C3=O)C=C4                                                                                                                                                                                                                                                                 | 2.881 | 2.909 | ++  | ++  |  |  | 11.273 |
| HT447 | [F]C=5C=CC(CN3CC2=C(C1=CC=CN=C1C(O)=C2C3=O)C4=CC(=CC=C4)C(=O)OCC)=CC=5                                                                                                                                                                                                                                                           | 3.322 | 2.634 | +   | ++  |  |  | 11.549 |
| HT448 | [F]C=5C=CC(CN3CC2=C(C1=CC=CN=C1C(O)=C2C3=O)C4=C([F])C=C/C=C4/[F])=CC=5                                                                                                                                                                                                                                                           | 2.525 | 3.202 | ++  | +   |  |  | 10.980 |
| HT449 | [F]/C4=C/C=C(/CN3C(=O)C2=C(OC)C1=CC=CN=C1C(O)=C2C3=O)C=C4                                                                                                                                                                                                                                                                        | 1.903 | 3.051 | +++ | +   |  |  | 11.131 |
| HT450 | OC=2C1=NC=CC=C1C=CC=2C(=O)NC/C3=C/C=C(/F)C=C3                                                                                                                                                                                                                                                                                    | 3.301 | 3.165 | +   | +   |  |  | 11.018 |
| HT451 | [F]C=5C=CC(CN3CC2=C(C1=CC=CN=C1C(O)=C2C3=O)C4=CC=C/C=C4/C(=O)OCC)=CC=5                                                                                                                                                                                                                                                           | 2.544 | 1.711 | ++  | +++ |  |  | 12.471 |
| HT452 | [F]C=4C=CC(CN3C(=O)C2=C(OC(=O)N(C)C)C1=CC=CN=C1C(O)=C2C3=O)=CC=4                                                                                                                                                                                                                                                                 | 3.380 | 3.162 | +   | +   |  |  | 12.402 |
| HT453 | [F]C=5C=CC(CN3CC2=C(C1=CC=CN=C1C(O)=C2C3=O)C4=CC=C(C=C4)OCC)=CC=5                                                                                                                                                                                                                                                                | 3.079 | 3.070 | +   | +   |  |  | 11.113 |
| HT454 | [F]/C4=C/C=C(/CN3C/C2=C(\OC)C1=NC=CN=C1C(O)=C2C3=O)C=C4                                                                                                                                                                                                                                                                          | 2.322 | 2.961 | ++  | ++  |  |  | 11.222 |
| HT455 | [F]/C4=C/C=C(/CN3C/C2=C(\OC)C1=CC([F])=CN=C1C(O)=C2C3=O)C=C4                                                                                                                                                                                                                                                                     | 0.857 | 3.273 | +++ | +   |  |  | 10.909 |
| HT456 | [F]/C4=C/C=C(/CN3C/C2=C(\OC)C1=CC(=CN=C1C(O)=C2C3=O)C=C4                                                                                                                                                                                                                                                                         | 2.929 | 3.592 | ++  | +   |  |  | 10.591 |
| HT457 | [F]C=4C=CC(CN3C/C2=C(\O[S](=O)(=O)N(C)C)C1=NC=CN=C1C(O)=C2C3=O)=CC=4                                                                                                                                                                                                                                                             | 1.519 | 1.857 | +++ | +++ |  |  | 12.326 |
| HT458 | [F]C=4C=CC(CN3C/C2=C(\O[S](=O)(=O)N(C)C)C1=CC=CN=C1C(O)=C2C3=O)=CC=4                                                                                                                                                                                                                                                             | 2.407 | 1.939 | ++  | +++ |  |  | 12.243 |
| HT459 | [F]/C4=C/C=C(/CN3C/C2=C(\OC)C1=CC(=CN=C1C(O)=C2C3=O)OC)C=C4                                                                                                                                                                                                                                                                      | 1.968 | 3.117 | +++ | +   |  |  | 11.066 |
| HT460 | [F]C=5C=CC(CN4CC=3C(OC)=C1C(N=CN1C/C2=C/C=CC=C2)=C(O)C=3C4=O)=CC=5                                                                                                                                                                                                                                                               | 4.380 | 4.099 | +   | +   |  |  | 12.881 |
| HT461 | O=C(CC(=O)C(=O)OC)C1=CC=CN1C/C2=C/C=C(/F)C=C2                                                                                                                                                                                                                                                                                    | 4.681 | 4.586 | +   | +   |  |  | 13.224 |
| HT462 | N[C@]([H])(C(=O)N[C@](C)([H])C(=O)N[C@@]([H])(C/C1=C/C=C(O)C=C1)C(=O)N[C@@]([H])(C/C2=C/C=CC=C2)C(=O)N[C@@]([H])(CC(C)(C)[H])C(=O)N[C@@]([H])(CCCCN)C(=O)N[C@@]([H])(CC(C)(C)[H])C(=O)N[C@@]([H])(C(=O)NCC(=O)N[C@@]([H])(C(=O)N[C@@]([H])(C/C3=C/NC4=CC=CC=C34)C(=O)O)[C@](O)(C)[H])                                            | 4.903 | 4.916 | +   | +   |  |  | 13.245 |
| HT463 | N[C@]([H])(C(=O)N[C@](C)([H])C(=O)N[C@@]([H])(C/C1=C/C=C(O)C=C1)C(=O)N[C@@]([H])(C/C2=C/C=CC=C2)C(=O)N[C@@]([H])(CC(C)(C)[H])C(=O)N[C@@]([H])(CCCCN)C(=O)N[C@@]([H])(CC(C)(C)[H])C(=O)N[C@@]([H])(C(=O)NCC(=O)N[C@@]([H])(CCC/N=C(N)N)C(=O)N[C@@]([H])(C/C3=C/NC4=CC=CC=C34)C(=O)O)[C@](O)(C)[H])                                | 5.498 | 5.492 | +   | +   |  |  | 13.441 |



|       |                                                                                                                                    |       |       |     |     |        |
|-------|------------------------------------------------------------------------------------------------------------------------------------|-------|-------|-----|-----|--------|
| HT485 | <chem>C/C([Cl])=C([F])C=C2)C3=O)C(C)(C)[H]</chem><br>OC=1C(=O)N(C(CCC(=O)OC)=C3C=1C(=O)N(C/C2=C/C([Cl])=C([F])C=C2)C3=O)C(C)(C)[H] | 3.851 | 3.836 | +   | +   | 13.370 |
| HT486 | <chem>OC=1C(=O)NC(COC(=O)C)=C3C=1C(=O)N(C/C2=C/C([Cl])=C([F])C=C2)C3=O</chem>                                                      | 4.090 | 4.054 | +   | +   | 13.423 |
| HT487 | <chem>OC=1C(=O)NC(CO)=C3C=1C(=O)N(C/C2=C/C([Cl])=C([F])C=C2)C3=O</chem>                                                            | 3.813 | 3.512 | +   | +   | 12.483 |
| HT488 | <chem>OC=1C(=O)N(C)C(=NC=1C(=O)NC/C2=C/C(/[F])C=C2)C(C)(C)C(=O)C3=N/N=C(/C)O3</chem>                                               | 1.826 | 1.378 | +++ | +++ | 12.804 |
| HT489 | <chem>[F]C=3C=CC(CN1CCC2=CC(=CC=C12)C(=O)NO)=C([F])C=3</chem>                                                                      | 4.924 | 3.103 | +   | +   | 11.080 |
| HT490 | <chem>O=C2N(O)C(=O)C1=CC=CC=C1[C@]2([H])[C@]3([H])CCCCC3</chem>                                                                    | 3.130 | 5.160 | +   | +   | 9.023  |
| HT491 | <chem>O=C(NNCC=1C=CC=CC=1O)C=2C=CC=CC=2O</chem>                                                                                    | 2.845 | 1.425 | +++ | ++  | 12.758 |
| HT492 | <chem>CC=2C(CC(=O)C1=CC(C=O)=C(O)C=C1C)=CC=C(C=2O)C(=O)OC</chem>                                                                   | 5.090 | 6.164 | +   | +   | 13.020 |
| HT493 | <chem>O=C(O)C=2C(=O)N(C)C1=CC=C(C=C1C=2O)C=3C=CC([F])=CC=3</chem>                                                                  | 4.362 | 3.587 | +   | +   | 10.596 |
| HT494 | <chem>[F]C=1C=C2C(=CC=1)N(C=C(C2=O)C(=O)CC(=O)C(=O)O)C/C3=C/C(/[F])C=C3</chem>                                                     | 3.362 | 3.333 | +   | +   | 13.566 |
| HT495 | <chem>O=C4C=1C=CC=CC=1C(=O)C(=CC=3C(O)=C2C=CC=C/C2=C(O)C=3O)C4=O</chem>                                                            | 4.301 | 3.122 | +   | +   | 11.061 |
| HT496 | <chem>OC=1C=CC=CC=1C(=O)N3N=C/C(=C/C2=C/C=CC(O)=C2)C3=O</chem>                                                                     | 3.869 | 3.966 | +   | +   | 12.252 |
| HT497 | <chem>O=C(NC/C2=C/C1=CC=CC=C1[S]2)C=3N=C(NC(=O)C=3O)C=4[S]C=CC=4</chem>                                                            | 1.000 | 0.562 | +++ | +++ | 13.621 |
| HT498 | <chem>O=C4OC1=CC=CC=C1C=3OC=2C=CC=CC=2[C@]([H])(C=34)C6=C(O)C5=CC=CC=C5OC6=O</chem>                                                | 5.086 | 4.516 | +   | +   | 9.666  |
| HT499 | <chem>OC=1C=CC=CC=1CNNC[C@@]([O])([H])CO/C2=C/C=CC=C2</chem>                                                                       | 5.301 | 6.220 | +   | +   | 13.561 |
| HT500 | <chem>O=C1N(NC(=C)C1=C/C2=C/C(/O)C=C2)C(=O)C3=C/C=C(/[Cl])C=C3</chem>                                                              | 5.467 | 5.278 | +   | +   | 12.327 |
| HT501 | <chem>OC=1C=CC=CC=1C(=O)NNC(=O)C2=CC=CC(O)=C2O</chem>                                                                              | 2.699 | 1.892 | ++  | +++ | 12.290 |
| HT502 | <chem>O=C(OC)C2=CC=C1C=C(OC1=C2)CC/C3=C/C(/O)C(O)=C3</chem>                                                                        | 4.641 | 4.624 | +   | +   | 12.449 |
| HT503 | <chem>O=C(NC=1N=CN=C2C=1N=CN2C/C3=C/C(/[F])C=C3)C=5C=CC4=CC=CN=C4C=5O</chem>                                                       | 4.049 | 3.931 | +   | +   | 13.568 |
| HT504 | <chem>O=C(NC/C1=C/C=C(/[Cl])C([Cl])=C1)C=2N=C(NC(=O)C=2O)C=3[S]C=CC=3</chem>                                                       | 1.000 | 0.650 | +++ | +++ | 13.533 |

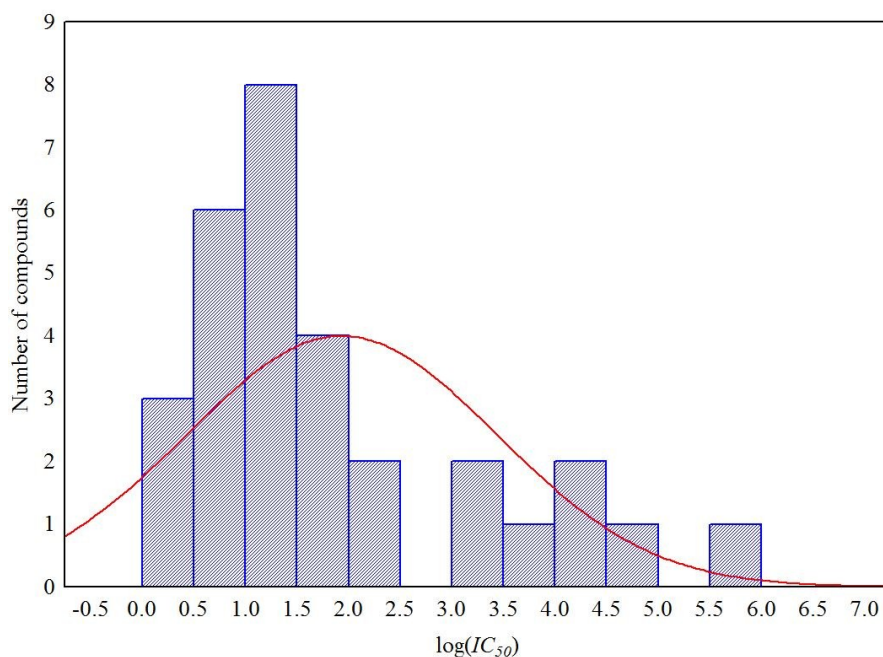

Figure S1: Activity value distribution of training set molecules.



Table S2: Statistical parameters of Sets 1, 2, 3 and 4

| Parameters                            | Set 1 | Set 2 | Set 3 | Set 4 |
|---------------------------------------|-------|-------|-------|-------|
| <i>R</i>                              | 0.940 | 0.791 | 0.931 | 0.729 |
| <i>s</i>                              | 2.847 | 5.897 | 3.576 | 6.164 |
| <i>Q</i> <sup>2</sup>                 | 0.912 | 0.624 | 0.899 | 0.542 |
| <i>R</i> <sup>2</sup> <sub>pred</sub> | 0.847 | 0.429 | 0.511 | 0.394 |
| <i>s</i> <sub>p</sub>                 | 0.697 | 1.170 | 1.112 | 1.231 |

Table S3: SMILES, fit value observed and estimated activity of set 2

| SN | SMILES                                                                                                                                                                                                    | Activity<br>Log(IC <sub>50</sub> ) |                   | Fit<br>Value |
|----|-----------------------------------------------------------------------------------------------------------------------------------------------------------------------------------------------------------|------------------------------------|-------------------|--------------|
|    |                                                                                                                                                                                                           | <sup>1</sup> Obs.                  | <sup>2</sup> Est. |              |
| 1  | <chem>O=C(C=1N=C(N(C(=O)C=1O[H])C([H])([H])[H])C@@]2([H])N(C([H])([H])C([H])([H])OC2([H])([H])C([H])([H])C([H])([H])N([H])C([H])([H])C3=C([H])C([H])=C([F])C([H])=C3[H])</chem>                           | 1.519                              | 0.763             | 10.360       |
| 2  | <chem>O=C1C(O[H])=C(N=C(N1C([H])([H])[H])C2(N(C([H])([H])[H])C([H])([H])[H])C([H])([H])OC([H])([H])C2([H])[H])C(=O)N([H])C([H])([H])C=3C([H])=C([H])C([F])=C([H])C=3[H]</chem>                            | 0.301                              | 0.930             | 10.193       |
| 3  | <chem>O=C(C=1N=C2N(C(=O)C=1O[H])C([H])([H])C([H])([H])C([H])([H])C@@]2([H])N(C([H])([H])[H])[S](=O)(=O)N(C([H])([H])[H])C([H])([H])[H])N([H])C([H])([H])C3=C([H])C([H])=C([F])C([H])=C3[H]</chem>         | 0.699                              | 0.937             | 10.186       |
| 4  | <chem>[F]/C1=C([H])C([H])=C(C([H])=C1[H])C([H])([H])C2=NN=C(O2)C4=NC(=C3C([H])=C([H])C([H])=N/C3=C4/O[H])C=5C([H])=C(C([H])C=C([H])C=5[H])[S](=O)(=O)N([H])C([H])(C([H])([H])[H])C([H])([H])[H]</chem>    | 0.602                              | 0.953             | 10.171       |
| 5  | <chem>O=C1C(O[H])=C(N=C(N1C([H])([H])[H])C(N([H])[S](=O)(=O)N(C([H])([H])[H])C([H])([H])[H])C([H])([H])[H])C([H])([H])[H])C([H])([H])[H])C(=O)N([H])C([H])([H])C=2C([H])=C([H])C([F])=C([H])C=2[H]</chem> | 1.079                              | 0.963             | 10.160       |
| 6  | <chem>O=C1C(O[H])=C(N=C(N1C([H])([H])[H])C(N2C([H])([H])C([H])([H])OC([H])([H])C2([H])[H])C([H])([H])[H])C([H])([H])[H])C(=O)N([H])C([H])([H])C=3C([H])=C([H])C([F])=C([H])C=3[H]</chem>                  | 0.477                              | 1.034             | 10.089       |
| 7  | <chem>O=C/C2=N/C(=C1C/N=C(/[H])C([H])=C1[H])=C2O[H])N3C([H])([H])C([H])([H])N(C(=O)C([H])([H])[H])C([H])([H])C3([H])[H])N([H])C([H])([H])C4=C([H])C([H])=C([F])C([H])=C4[H]</chem>                        | 1.398                              | 1.260             | 9.863        |
| 8  | <chem>O=C1C(O[H])=C(N=C(N1[H])C=2[S]C([H])=C([H])C=2[H])C(=O)N([H])C([H])([H])C=3C([H])=C([H])C([H])=C([H])C=3[H]</chem>                                                                                  | 1.929                              | 1.397             | 9.726        |
| 9  | <chem>[F]/C1=C([H])C([H])=C(C([H])=C1[H])C([H])([H])N4C(=O)C=3C(O[H])=C2/N=C(/[H])C(OC([H])([H])[H])=C([H])C2=C(OC([H])([H])[H])C=3C4([H])[H]</chem>                                                      | 1.968                              | 1.555             | 9.568        |
| 10 | <chem>O=C/C2=N/C(=C1C/N=C(/[H])C([H])=C1[H])=C2O[H])N(C(=O)C(=O)N3C([H])([H])C([H])([H])C([H])([H])C3([H])[H])C([H])([H])[H])N([H])C([H])([H])C4=C([H])C([H])=C([F])C([H])=C4[H]</chem>                   | 0.845                              | 1.605             | 9.519        |
| 11 | <chem>[F]/C1=C([H])C([H])=C(C([H])=C1[H])C([H])([H])C2=NN=C(O2)C4=NC(=C3C([H])=C([H])C([H])=N/C3=C4/O[H])C=5C([H])=C(C([H])=C([H])C=5[H])C(=O)O[H]</chem>                                                 | 0.301                              | 1.781             | 9.342        |
| 12 | <chem>O=[S](=O)(=O)C([H])=C([H])C=1C([H])=C(O[H])C(O[H])=C(O[H])C=1[H])C([H])([H])[S](=O)(=O)C([H])=C([H])C=2C([H])=C(O[H])C(O[H])=C(O[H])C=2[H]</chem>                                                   | 3.255                              | 2.004             | 9.119        |
| 13 | <chem>O=C(OC([H])([H])C([H])([H])OC(=O)C([H])=C([H])C=1C([H])=C(O[H])C(O[H])=C([H])C=1[H])C([H])=C([H])C=2C([H])=C(O[H])C(O[H])=C([H])C=2[H]</chem>                                                       | 2.602                              | 2.037             | 9.087        |
| 14 | <chem>O=C(O[C@]([H])(C(=O)O[H])[C@]([H])(OC(=O)C([H])=C([H])C1=C([H])C([H])=C(O[H])C(O[H])=C1[H])C(=O)O[H])C([H])=C([H])C2=C([H])C([H])=C(O[H])C(O[H])=C2[H]</chem>                                       | 2.699                              | 2.813             | 8.310        |
| 15 | <chem>O=C/C3=C([S][S]/C2=C([C(=O)N([H])N([H])C(=O)C1=C([S][H])C([H])=C([H])C([H])=C1[H])C([H])=C([H])C([H])=C2[H])C([H])=C([H])C([H])=C3[H])N([H])N([H])C(=O)C4=C([S][H])C([H])=C([H])C([H])=C4[H]</chem> | 4.041                              | 2.821             | 8.302        |
| 16 | <chem>O=C(O[C@@]([H])(C(=O)O[H])[C@@]([H])(OC(=O)C([H])=C([H])C1=C([H])C([H])=C(O[H])C(O[H])=C1[H])C(=O)O[H])C([H])=C([H])C2=C([H])C(O[H])=C(O[H])C([H])=C2[H]</chem>                                     | 2.903                              | 2.965             | 8.158        |









|    |                                                                                                                                                                                |       |       |       |
|----|--------------------------------------------------------------------------------------------------------------------------------------------------------------------------------|-------|-------|-------|
| 26 | ([H])C([H])([H])N([H])C([H])([H])C4([H])[H]<br>O=C(C=1N(C=3C(C=1[H])=C([H])C=2OC([H])([H])OC=2C=3[H])C([H])([H])C4=C([H])C([H])=C([H])C([H])=C4[H])C([H])([H])C(=O)C(=O)O[H]   | 3.301 | 3.995 | 6.357 |
| 27 | O=[S](=O)(C([H])=C([H])C1=C([H])C([H])=C([H])C([H])=C1[H])C([H])([H])[S](=O)(=O)C([H])=C([H])C=2C([H])=C(/C(=C(/OC([H])([H])[H])C=2[H])C(=O)C([H])([H])[H])C(=O)C([H])([H])[H] | 4.903 | 4.006 | 6.345 |
| 28 | [Cl]C=1C([H])=C([H])C(=C([H])C=1[H])C([H])([H])C4=N/N=C(/C3=N/C([H])=C2C([H])=C([H])C([H])=N/C2=C3\O[H])N4[H]                                                                  | 2.806 | 4.100 | 6.251 |
| 29 | O=C(/C2=C(\O[H])C=1/N=C(/[H])C([H])=C([H])C=1C([H])=C2[H])C3=C([H])C(=C([H])C([H])=C3[H])C([H])([H])C4=C([H])C([H])=C([H])C([H])=C4[H]                                         | 2.568 | 4.109 | 6.242 |
| 30 | O=C(O[H])C3=C([H])C([H])=C1C(N=C(C([H])=C1[H])C([H])=C([H])C2=C([H])C([Br])=C(O[H])C([Br])=C2[H])=C3O[H]                                                                       | 3.114 | 4.243 | 6.109 |

<sup>1</sup>Observed; <sup>2</sup>Estimated
